# Supplementary material for: Sex differences in discrimination behavior and orbitofrontal engagement during context-gated reward prediction
Source: eLife. 2024 Jul 24;12:RP93509. doi: 10.7554/eLife.93509 (PMC11268887; doi:10.7554/eLife.93509)
Supplement: Figure 1—source data 1. [file elife-93509-fig1-data1.xlsx]

## Sheet: Ctx-dep O1
Rewarded Trials
RatID#	Sex	Bin-1	Bin-2	Bin-3	Bin-4	Bin-5	Bin-6	Bin-7	Bin-8	Bin-9	Bin-10	Bin-11	Bin-12	Bin-13	Bin-14	Bin-15	Bin-16	Bin-17	Bin-18
AB03	F	8.17	18.46	30.81	28.44	33.02	43.26	45.15	32.39	40.41	29.48	30.4	32.95	33.86	31.73	23.39	25.75	24.18	24.54
AB04	F	22.43	61.45	53.97	38.72	45.4	39.42	18.41	17.04	17.72	16.43	13.67	13.44	20.74	14.71	15.78	14.22	13.91	13.9
AB07	F	41.73	55.34	82.2	86.19	77.43	82.93	83.77	82.75	82.56	84.46	85.29	77.01	79.13	79.29	76.69	78.88	76.79	76.94
AB08	F	28.71	75.51	92.73	92.18	93.18	95.31	87.67	81.57	85.45	77.86	75.04	75.74	77.85	80.23	82.08	78.12	78.78	80.91
AB11	F	13.11	62.61	76.8	76.78	67.29	72.03	70.18	64.74	71.18	72.84	74.77	67.19	58.17	55.34	68.9	56.95	65.79	65.88
AB12	F	3.79	13.43	22.41	36.97	31.27	35.98	38.7	34.51	24.61	32.66	33.34	25.85	33.27	36.11	32.05	34.3	30.73	31.1
AB14	F	52.26	79.59	91.72	87.77	86.91	85.07	84.55	84.11	88.54	81.23	77.28	84.57	90.01	80.89	88.94	86.09	83.28	85.65
AB15	F	14.5	31.6	43.44	31.65	31.43	37.58	46.24	46.7	44.1	42.06	54.12	52.91	56.28	65.5	65.38	64.85	66.36	65.73
AB16	F	19.44	66.78	72.97	56.51	38.64	38.96	33.35	26.57	25.52	27.05	27.04	25.32	30.75	29.13	29.4	29.34	32.27	31.64
AE02	F	24.8	41.05	82.04	87.27	82.22	85.06	76.08	75	81.64	88.55	90.05	90.36	88.05	89.77	88.83	91.72	91.78	88.23
AE03	F	0.11	7.92	3.07	4.27	3.94	1.11	2.56	1.92	5.25	3.58	3.33	5	5.11	4.34	4.06	3.83	5.11	4.6
AE04	F	8.68	2.47	5.31	3.79	3	3.17	3.96	2.11	4.08	6.42	6.24	4.58	6.87	7.47	4.7	7.87	7.95	6.86
AE15	F	13.84	16.39	58.92	74.22	69.1	68.22	48.56	66.54	66.38	79.9	79.71	80.7	78.67	80.69	81.05	79.79	80.5	79.75
AE16	F	19.67	19.42	51.31	65.87	68.66	59.05	35.85	51.52	59.51	67.58	68.57	70.28	67.59	67.09	70.17	70	70	67.34
AG03	F	1.11	58.29	56.63	66.49	72.29	65.51	62.64	69.07	73.16	70.11	66.08	63.06	65.15	71.35	84.46	77.21	83.62	84.4
AG04	F	37.29	92.53	90.45	86.25	87.87	75.39	81.07	71.35	74.48	67.76	70.11	60.37	48.2	53.49	58.41	57	50.76	44.74
AG08	F	0.46	3.29	13.79	19.77	25.53	20.67	23.49	24.49	27.91	19.3	26.71	25.88	25.65	26.09	32.24	32.66	31.79	32.29
AG11	F	8.77	16.95	33.58	59	66.76	64.54	63.12	68.28	73.97	67.16	50.44	56.55	58.58	63.98	61.41	49.5	68.32	61.55
AG12	F	8.55	19.94	45.7	65.05	73.97	73.07	77.39	74.77	84.03	79.29	66.52	62.68	59.99	72.17	75.3	73.94	74.16	74.56
AH01	F	18.1	40.2	68.77	67.96	85.04	71.11	64.84	62.95	70.33	73.32	69.14	73.72	75.17	74.27	75.03	80.49	77.17	71.6
AH07	F	2.61	5.91	14.9	40.34	67.97	79.85	85.76	88.77	83.58	74.59	65.85	60.63	78.57	81.7	85.92	80.34	80.96	90.14
AH09	F	10.34	48.16	68.12	49.56	59.19	50.59	54.93	49.05	49.49	46.27	55.62	61.21	61.73	73.69	71.16	68.17	72.03	60.64
AH10	F	11.3	16.36	53.79	58.78	67.55	59.92	51.28	56.4	50.73	62.05	47.88	71.87	72.33	82.02	68.75	71.95	79.07	84.08
AH11	F	18.08	19.18	10.3	17.9	18.34	21.24	27.22	22.56	23.31	18.63	17.23	19.98	13.72	17.23	22.31	25.43	8.18	12.8
AH15	F	12.92	42.67	67.5	67.38	70.44	68.8	67.16	66.76	81.59	76.87	59.66	58.02	50.76	60.41	60.06	57.71	64.9	67.41
AH16	F	13.51	27.74	67.94	72.37	75.52	61.66	66.93	69.41	74.87	78.67	76.06	75.85	63.96	66.41	72.39	71.52	78.55	77.37
AH21	F	14.05	44.03	71.81	72.91	90.72	78.46	86.82	81.2	82.58	79.87	68.49	62.51	72.38	76.75	66.99	84.92	85.06	82.31
AH22	F	21.54	74.84	92.75	95.23	94.78	92.41	90.13	90.56	94.61	85.25	85.83	78.31	88.11	83.78	85.05	80.34	83.43	77.27
AH23	F	20.05	81.9	85.57	80.65	73.56	76.76	70.84	70.65	51.41	65.71	59.43	66.04	64.35	54.64	57.36	64.28	62.76	50.77
AH24	F	49.66	92.28	94.39	92.15	93.58	75.85	81.45	78.07	81.65	73.1	59.05	57.96	72.76	52.48	60.97	68.68	63.78	75.53
AB01	M	10.31	43.13	77.05	85.44	85.27	83.75	81.81	79.64	77.24	84.24	79.43	85.68	84.81	80.88	86.82	79.88	82.25	81.29
AB02	M	5.3	22.87	62.05	65.97	74.31	79.23	80.58	55.29	65.89	54.29	61.22	66.87	69.27	61.42	71.38	65.31	71.05	70.84
AB05	M	15.03	68.96	79.43	74.15	69.61	61.38	44.64	47.02	40.99	50.56	50.97	44.44	54.51	42.88	52.13	50.54	51.33	51.07
AB06	M	15.16	49.85	72.91	76.03	86.29	86.06	86.16	81.71	81.4	80.97	81.64	70.67	74.84	73.4	74.49	69.72	70.49	70.57
AB09	M	46.27	65.47	30.69	30.39	32.94	30.14	34.27	39.35	45.73	40.61	51.66	38.44	35.97	34.51	36.53	38.99	37.3	37.71
AB10	M	26.48	37.5	30.37	35.92	47.84	49.81	56.96	47.88	45.18	44.96	45.1	51.09	37.14	35.36	39.89	38.64	35.68	35.27
AB13	M	13.5	23.54	33.83	36.77	47.86	50.34	42.26	44.29	28.93	37.32	36.15	41.66	44.04	37.46	52.8	51.58	51.17	52.42
AE01	M	14.08	53.85	59.22	67.45	67.92	69.28	62.36	59.78	57.19	56.28	56.77	57.38	55.01	56.76	56.51	58.15	56.06	54.82
AE13	M	53.14	61.9	90.33	90.61	86.45	82.72	76.89	69.98	89.51	92.67	96.62	98.47	95.1	95.09	97.29	95.6	95.19	97.92
AE14	M	35.96	44.01	52.85	41.88	39.93	47.23	52.49	48.21	41.16	42.09	43.21	41.69	42.88	42.09	41.53	41.23	41.88	43.14
AG01	M	5.9	9.16	11.73	26.28	40.12	41.83	55.55	61.65	59.67	51.51	39.28	45.36	49.3	66.15	57.84	61.28	65.07	64.1
AG02	M	8.36	32.59	53.3	71.59	76.97	82.95	84.99	83.34	80.13	76.2	80.4	77.35	66.63	72.75	63.69	74.97	75.61	71.41
AG05	M	2.63	9.39	39.96	66.04	77.78	75.53	75.23	66.9	75.12	62.55	58.9	43.62	48.7	54.46	54.78	58.43	58.69	60.83
AG06	M	5.24	16.3	35.25	52.57	67.79	53.76	52.22	41.57	54.94	47.73	52.27	48.39	47.46	45.14	46.6	42.79	42.79	43.17
AG07	M	20.97	56.53	56.82	61.94	64.15	65.35	54.18	53.46	50.96	46.94	56.15	64.1	51.58	52.01	59.75	57.01	57.64	57.3
AG09	M	8.28	36.42	53.33	58.87	40.77	53.31	51	43.13	49.72	41.53	32.8	35.6	43.87	45.52	43.48	42.65	43.49	41.54
AG10	M	13.2	18.07	39.85	45.81	41.16	37.56	41.3	47.96	50.97	47.43	52.99	47.93	51.16	53.35	62.96	52.56	57.02	55.59
AG25	M	4.75	11.25	33.26	78.23	79.92	79.57	77.11	66.77	76.31	62.41	65.7	62.03	62.17	62.61	62.74	62.4	62.57	62.51
AG26	M	11.11	8.65	15.28	38.89	62.25	71.77	70.96	76.99	68.72	77.33	73.2	76.62	75.16	76.03	76.33	76.22	76.23	76.25
AH02	M	11.28	22.06	50.65	78.36	82	84.69	77.16	82.74	88.52	82.29	73.15	77.22	74.79	73.48	75.4	70.89	76.6	70.02
AH03	M	5.85	14.24	22.09	23.49	18.39	25.63	39.98	40.25	49.95	39.34	29.44	36.65	54.33	64.55	48.13	62.06	63.72	36.07
AH04	M	15.3	32.12	56.86	63.29	69.02	66.17	58.2	57.97	60.37	55.57	39.63	31.21	48.9	51.69	41.24	36.24	41.34	39.77
AH05	M	7.44	17.86	42.59	62.58	79.43	68.1	73.45	71.88	75.91	68.08	59.77	68.36	64.48	66.56	61.12	69.61	71.85	71.04
AH06	M	9.97	25.65	55.59	62.09	51.38	52.51	60.51	57.85	47.8	40.73	43.05	39.28	54.2	48.86	35.51	49.53	46.68	45.69
AH08	M	7.64	32.06	57.19	85.72	86.71	86.39	78.93	72.98	74.25	66.24	75.11	62.36	66.8	68.22	70.16	65.72	62.07	64.58
AH12	M	28.52	37.67	12.32	20.91	36.93	30.06	26.49	31.66	43.53	33.41	39.64	43.91	44.44	52.27	56.11	57.71	45.67	46.26
AH13	M	15.73	57.98	83.79	88.78	86.24	86.87	87.12	89.02	91.15	88.65	80.96	83.83	80.08	76.51	76.88	76.54	75.03	70
AH14	M	3.63	23.45	17.18	36.28	51.02	52.56	51.34	71.44	58.32	69.26	59.85	42.3	52.8	59.32	48.87	50.59	57.41	62.42
AH17	M	15.85	43.01	60.66	66.81	71.39	67.17	70.25	71.6	52.67	60.15	58.47	58.59	59.92	68.74	58.41	62.11	53.82	62.22
AH18	M	8.93	13.55	15.11	22.36	44.39	60.99	62.39	67.03	80.64	71.63	59.25	66.53	66.97	71	60.44	67.32	64.26	78.46
AH19	M	8.19	20.65	55.96	57.19	65.74	60.03	65.73	66.01	73.91	76.06	59.04	66.45	66.72	72.97	72.21	68.21	76.42	77.26
AH20	M	10.54	33.29	29.86	50.87	74.85	63.06	61.01	42.99	39.19	23.15	27.85	44.95	46.66	47.18	74.16	61.25	62.92	69.05
Non rewarded Trials
RatID#	Sex	Bin-1	Bin-2	Bin-3	Bin-4	Bin-5	Bin-6	Bin-7	Bin-8	Bin-9	Bin-10	Bin-11	Bin-12	Bin-13	Bin-14	Bin-15	Bin-16	Bin-17	Bin-18
AB03	F	13.95	17.59	22.04	18.88	19.64	31.11	32.67	22.36	19.11	14.16	9.86	15.17	10.99	17.84	13.74	11.8	15.71	15.03
AB04	F	29.6	64.43	54.3	36.46	42.01	35.39	18.84	14.93	16.22	10.91	14.96	8.81	16.85	12.35	11.9	13.53	11.95	11.55
AB07	F	41.79	57.78	81.48	82.06	73.81	71.87	72.07	58.13	57.83	29.68	27.11	27.28	23.14	21.84	18.64	18.49	18.89	18.52
AB08	F	26.24	77.24	92.53	87.77	86.6	78.13	69.45	57.26	55.04	32.22	27.35	26.66	27.82	25.27	20.68	22.81	24.25	24.16
AB11	F	14.63	55.83	65.34	68.29	58.32	71.62	60.94	52.02	50.02	50.41	40.51	36.9	39.11	45.15	41.98	41.95	48.59	46.36
AB12	F	10.02	15.96	21.69	33.8	33.41	36.22	31.04	25.59	22.63	28.98	24.11	30.7	33.2	33.23	36.38	33.85	32.68	34.47
AB14	F	52.08	79.82	91.13	79.98	82.65	78.91	75.91	73.92	70.47	58.94	51.85	64.76	52.94	49.8	50.97	50.77	49.21	50.52
AB15	F	9.3	31.57	42.76	28.32	30.99	32.48	37.33	31.63	20.41	23.44	17.26	16.41	17.34	16.48	13.49	14.98	14.8	14.69
AB16	F	20.06	66.97	70.47	48.4	37	37.07	19.62	17.1	12.42	10.53	11.46	8.07	12.38	7.56	7.95	8.59	7.86	8.08
AE02	F	26.54	39.8	75.95	84.17	78.02	80.6	72.99	58.32	68.44	70.76	73.25	73.6	72.05	73.85	71.53	72.34	75.09	74.86
AE03	F	0.59	11.58	2.89	2.83	3.82	2.11	2.24	4.66	4.51	3.83	4.29	2.35	3.11	3.46	3.14	5.59	4.2	4.16
AE04	F	9.31	1.87	4.75	3.83	4.5	5.3	6.55	7.28	7.29	10.54	10.56	12.01	10.05	9.5	10.49	12.04	8.58	9.35
AE15	F	14.46	16.35	56.27	69.03	62.76	52.27	32.69	42.08	40.76	50.52	48.07	49.77	47.04	48.63	48.5	47.49	46.16	46.65
AE16	F	18.78	19.75	42.92	62.92	63.92	51.6	37.38	49.96	54.08	54.82	54.01	54.37	55.65	55.94	54.02	52.38	54.22	53.37
AG03	F	2.02	54.55	56.65	55.39	67.4	69.35	57.51	60.9	61.97	61.68	43.14	23.81	28.12	30.86	52.83	34.86	32.19	33.02
AG04	F	44.96	88.58	86.67	84.57	83.3	74.15	78.05	73.06	71.74	68.74	63.44	53.89	42.9	44.4	56.19	51.47	48.98	44.24
AG08	F	0.61	3.91	12.48	17.4	16.88	5.71	11.35	11.05	8.61	5.36	8.94	6.4	4.49	4.15	3.71	5.13	4.76	3.8
AG11	F	9.88	15.91	34.4	59.48	67.64	60.27	61.58	65.72	66.21	56.84	50.59	51.7	55.44	50.01	45.17	28.47	38.16	32.77
AG12	F	21.38	20.08	48.29	63.11	75.07	66	67.73	79.89	75.71	64.71	55.94	52.03	46.5	45.32	61.72	48.99	38.97	36.62
AH01	F	17.72	34.7	68.81	68.71	75.58	75.1	64.56	61	61.54	69.41	55.88	52.72	46.75	39.99	38.01	38.8	35.85	33.6
AH07	F	4.41	5.55	17.78	28.89	68.88	78.76	83.8	88.42	82.42	71.25	61.03	43.54	56.54	53.45	48.29	40.69	27.05	36.81
AH09	F	11.75	50.23	63.94	40.1	51.29	40.23	37.33	28.47	27.75	29.93	33.42	23.04	40.99	42.53	41.19	31.75	26.29	28.18
AH10	F	12.65	18.07	50.58	57.34	62.84	61.87	52.91	56.08	53.68	66.35	58.31	73.36	73.4	79.91	58.95	58.68	70.68	80.91
AH11	F	20.78	20.97	11.65	18.83	23.57	24.43	25.51	19.44	20.56	11.81	13.48	16.19	9.82	8.86	16.22	16.6	1.07	2.74
AH15	F	17.46	36.55	69.48	70.8	70.71	68.26	69.89	67.37	75.3	77.28	58.72	56.83	49.55	57.78	55.13	55	57.64	58.28
AH16	F	12.26	29.03	71.7	72.06	73.19	59.67	68.5	67.78	71.19	78.02	75.27	66.58	59.04	66.57	65.6	67.14	66.92	67.67
AH21	F	16.12	42.77	79.61	80.68	96.21	78.37	82.68	76.31	68.37	67.02	54.38	46.77	49.91	49.55	47.65	51.01	43.5	41.47
AH22	F	24.44	66.7	96.17	95.38	95.61	91.3	87.79	84.68	81.62	72.16	54.29	42.05	38.53	34.33	39.27	35.8	26.46	24.46
AH23	F	15.88	75.13	85.77	80.73	75.72	69.7	66.36	56.94	44.45	48.91	41.74	33.47	26.35	23.86	8.42	10.41	9.91	5.81
AH24	F	45.81	89.34	92.37	92.47	92.13	69.86	76.87	70.84	72.84	68.86	50.32	43.57	44.68	35.39	31.38	32.57	26.24	22.12
AB01	M	10.89	44.38	71.56	67.97	70.35	68.67	62.34	62.66	43.27	26.03	19.12	17.99	18.51	13.16	13.41	14.8	12.55	9.11
AB02	M	8.63	19.56	63.34	72.7	71.35	74.06	71.37	44.87	51.83	46.03	29.31	37.66	37.35	24.94	15.39	15.19	12.89	10.92
AB05	M	14.76	67.21	78.75	67.71	61.8	54.63	42.34	37.76	34.61	29.9	26.09	19.24	17.56	13.11	14.26	14	13.28	12.85
AB06	M	21	50.94	64.78	73.78	81.58	75.71	71.44	62.77	52.73	45.55	39.32	26.96	27.36	22.7	16.36	17.41	13.9	14.39
AB09	M	39.01	63.63	31.5	31.29	45.65	41.62	30.85	30.46	31.84	26.62	19.68	21.68	17.86	16.11	14.17	14.68	14.73	14.72
AB10	M	23.35	36.07	27.81	36.49	42.96	38.53	35.62	36.96	25.44	17.65	14.19	19.82	12.45	12.79	12.18	13.18	10.75	11.94
AB13	M	16.9	25.69	28.89	33.12	26.98	17.37	10.7	13.78	8.92	5.32	7.48	6.74	5.84	4.62	5.34	5.54	5.11	5.28
AE01	M	18.87	54.5	55.07	65.6	58.68	46.4	30.57	23.59	20.03	14.06	14.37	12.57	14.68	15.1	14.82	13.72	14.18	14.21
AE13	M	49.35	59.08	92.7	88.02	80.21	62.4	46.45	42.24	52.54	60.72	60.55	59.25	62.37	61.95	61.86	62.05	61.67	61.09
AE14	M	40.93	42.95	53.75	35.47	30.04	29.31	27.99	16.39	13.46	14.76	14.82	14.56	16.52	13.1	13.22	13.51	14.66	15.84
AG01	M	12.71	12.67	9.31	24.32	29.59	37.19	46.69	47.71	39.85	43.29	31.12	27.37	24.45	29.22	23.81	19.62	17.28	17.28
AG02	M	18.54	35.88	54.62	65.13	65.57	69.11	62.64	56.22	41.04	39.61	24.16	19.16	17.3	18.11	16.48	12.54	9.22	9.37
AG05	M	4.49	9.98	38.19	68.44	75.62	67.67	70.36	49.74	59.32	34.69	22.4	27.63	17.38	23.08	25.14	23.52	17.7	13.14
AG06	M	10.89	12.31	31.93	49.07	58.91	40.64	34.2	29.15	33.83	30.06	23.1	26.22	17.37	12.38	15.71	15.68	11.27	10.13
AG07	M	26.67	49.58	48.18	52.89	38.91	20.32	10.48	12.54	6.71	11.98	12.22	17.83	13.3	8.51	10.15	7.44	7.26	10.8
AG09	M	11.65	35.09	53.8	53.15	35.09	39.84	31.04	24.13	25.89	18.25	8.59	11.43	9.77	13.31	11.56	6.53	5.04	5.01
AG10	M	12.92	22.22	35.33	42.43	32.47	24.33	18.56	31.74	28.89	23.1	16.48	26	21.86	22.37	27.13	25.51	23.66	23.02
AG25	M	7.2	10.28	36.42	77.35	87.12	79.42	74.28	63.54	66.18	50.2	32.83	22.56	24.65	19.25	14.82	15.39	15.05	15.21
AG26	M	13.05	10.74	14.71	42.58	63.27	68.35	59.5	60.65	46.55	44.44	29.51	30.02	26.77	24.8	21.26	21.94	24.49	22.08
AH02	M	15.27	27.11	55.56	78.97	76.09	81.58	73.63	84.28	88.68	80.7	65.11	67.08	71.08	60.86	62.01	51.47	49.78	54.57
AH03	M	12.29	15.45	23.94	26.34	24.33	29.49	40.02	37.44	42.39	35.36	37.01	33.94	42.17	53.27	46.96	37.18	38.25	36
AH04	M	17.45	34.58	57.16	58.27	66.46	64.19	56.62	54.5	55	52.98	38.21	30.77	37.13	41.57	31.47	25.48	34.44	29.41
AH05	M	7.64	18.18	43.38	55.93	80.43	64.84	68.17	57.98	65.31	50.06	38.71	31.09	30.48	19.07	17.02	18.06	23.32	19.66
AH06	M	15.45	26.79	49.64	48.29	35.86	32.36	31.6	34.73	24.79	22.94	14.87	13.96	17.08	15.88	9.74	11.99	12.84	10.37
AH08	M	8.67	23.33	35.14	61.13	56.55	62.28	52.76	43.43	39.63	28.65	21.98	16.88	15.1	12.54	15.9	10.85	11.15	11.32
AH12	M	33.29	32.8	8.61	11.88	17.02	12.25	11.32	11.29	8.98	5.95	8.05	4.49	7.47	11.95	20.29	24.68	9.29	8.9
AH13	M	15.83	58.04	83.31	85.93	73.7	79.27	79.83	62.29	58.77	58.03	44.79	41.49	35.07	30.71	29.71	28.31	26.47	21.74
AH14	M	5.3	23.65	24.92	39.13	55.68	51.83	54.94	66.49	57.39	62.59	49.13	41.36	35.74	35.89	32.98	33.1	40.32	35.07
AH17	M	18.35	43.58	63.21	72.46	64.77	70.08	68.18	67.06	43.75	39.67	35.39	38.55	32.51	38.59	24.01	17.11	20.73	22.66
AH18	M	8.08	14.29	16.37	21.87	45.99	54.61	65.85	68.91	73.04	64.09	52.79	48.9	54	62.74	46.55	43	40.8	53.55
AH19	M	9.76	22.97	57.47	62.62	59.11	44.95	39.53	30.1	34.51	31	20.78	19.89	18.45	21.4	26.54	19.09	18.79	22.1
AH20	M	13.69	36.58	36.3	50.32	63.14	61.76	59.36	43.5	30.53	18.07	18.09	21.32	22.53	22.02	33.37	29.17	34.29	22.37
Pre-CS
RatID#	Sex	Bin-1	Bin-2	Bin-3	Bin-4	Bin-5	Bin-6	Bin-7	Bin-8	Bin-9	Bin-10	Bin-11	Bin-12	Bin-13	Bin-14	Bin-15	Bin-16	Bin-17	Bin-18
AB03	F	2.31	7.51	6.21	1.4	1.96	1.06	1.85	1.52	2.47	0.78	0.88	4.05	1.09	0.83	1.65	0.87	3.48	2.05
AB04	F	5.37	4.07	0.72	1.09	0.61	1.34	0.77	0.93	1.23	1.21	0.27	0.57	0.47	0.49	0.74	0.38	0.49	0.34
AB07	F	21.8	19.55	15.33	13.71	14.66	8.88	6.71	6.13	6.12	4.6	4.17	5.48	5.53	5.47	5.89	5.11	6.53	5.53
AB08	F	16.15	23.08	17.1	13.02	19.69	18.57	17.07	16.45	11.54	8.43	8.77	5.27	8.74	8.74	5.93	10.39	5.98	8.84
AB11	F	13.98	16.49	15.79	12.14	14.77	12.37	17.05	8.67	7.18	6.41	8.7	4.95	5.28	10.39	13.99	8.78	7.68	4.4
AB12	F	6.12	15.62	14.28	11.96	5.99	6.49	5.62	4.91	5.82	3.37	4.09	4.53	3.95	4.95	4.79	3.88	5.66	3.11
AB14	F	36.95	29.46	26.12	16.51	13.71	5.43	4.14	5.05	9.09	4.34	6.65	5.59	6.32	8.08	8.64	7.21	8.88	6.93
AB15	F	12.34	9.76	7.32	5.22	4.08	6.61	5.83	4.72	3.46	2.27	1.71	2.97	2.84	2.87	2.41	1.99	2.46	3.55
AB16	F	12	23.78	6.31	1.65	2.75	3.09	1.77	2.36	1.61	1.97	2.62	2.4	1.78	2.22	1.72	2.08	1.9	1.4
AE02	F	28.07	31.88	26.08	30.65	22.48	24.53	23.7	17.94	15.28	14.12	14.63	15.56	13.01	13.54	15.77	15.03	13.71	15.39
AE03	F	1.85	5.85	1.65	0.21	0.74	1.58	0.69	2.36	2.07	1.19	1.45	1.31	1.42	0.61	0.8	2.16	0.82	1.53
AE04	F	8.11	4.57	7.17	19.71	16.17	12.65	12.84	8.55	11.85	8.76	8.8	8.04	9.95	10.28	7.6	9.68	9.18	9.97
AE15	F	22.67	10.48	12.97	9.9	7.77	3.92	4.21	3.19	3.35	4.97	4.02	4.8	3.99	2.67	3.16	3.67	3.88	2.77
AE16	F	29.18	20.04	20.74	16.18	17.73	11.52	8.3	11.4	6.96	8.89	8.48	9.56	7.57	9.75	7.73	8.4	9.67	8.13
AG03	F	1.33	7.22	2.27	1.95	0.58	0.71	0.14	0.66	0.33	1.05	0.22	0.65	0.75	0.52	1.4	0.35	0.31	0.65
AG04	F	10.2	7.55	8.56	7.42	8.36	6.98	7.91	10.54	9.13	9.13	5.46	6.38	6.76	5.12	6.65	4.01	3	3.97
AG08	F	2.25	1.75	2.72	2.93	2.5	0.91	0.91	0.84	1.22	0.62	1.41	1.33	1.08	1.6	1.01	3.53	1.47	1.21
AG11	F	15.14	13.69	19.33	14.94	10.39	7.43	10	7.19	6.22	9.38	7.7	8.9	12.92	11.43	7.09	6.19	8.33	6.31
AG12	F	23.94	14.38	17.17	16.82	12.39	7.12	13.75	9.44	10.78	8.29	3.86	3.46	3.6	3.41	6.17	5.65	4.49	5.78
AH01	F	17.85	15.72	26.14	14.45	15.97	11.62	8.9	6.52	12.36	15.79	10.49	10.12	11.44	7.58	8.59	6.31	10.1	6.76
AH07	F	9.81	11.36	22.81	19.87	28.69	12.42	6.9	5.87	11.68	12.91	6.76	9.89	7.02	7.85	12.38	9.96	8.65	9.54
AH09	F	14.98	16.36	13.73	7.55	8.75	7.15	4.46	7.29	8.8	8.05	3.76	4.06	4.98	7.01	5.21	5.94	5.75	7.78
AH10	F	28.8	27.73	49.2	41.44	33.02	25.94	10.86	12.88	21.76	21.42	13.59	15.23	14.34	14.86	14.17	14.19	21.1	16.15
AH11	F	7.68	4.3	0.78	0.51	2.08	1.12	2.4	2.26	2.19	0.69	3.88	1.06	0.96	3.59	3.71	2.92	1.18	0
AH15	F	23.88	30.87	44.09	24.64	14.93	10.11	9.16	9.92	29.49	32.62	13.46	10.26	11.85	13.03	10.44	11.13	10.76	16.95
AH16	F	21.62	24.31	34.01	19.61	17.64	10.25	6.95	6.76	20.96	21.63	14.41	9.19	5.69	4.59	5.88	5.89	10.81	23.75
AH21	F	22.06	24.54	30.8	23.27	24.9	14.76	11.52	15.37	21.9	25.39	9.64	11.85	9.39	10.43	7.42	10.22	10.96	12
AH22	F	33.09	46.55	49.35	30.62	20.16	22.27	10.99	15.47	35.69	28.83	14.58	12.79	14.2	11.39	13.74	11.26	11.45	7.23
AH23	F	5.03	8.14	6.38	2.92	1.19	0.98	0.41	0.53	0.14	0.46	0.34	0.3	0.14	0.18	0.1	1.22	1.03	0.08
AH24	F	19.54	13.12	3.19	2.22	1.44	3.34	1.62	0.78	0.83	3.69	1.1	2.14	2.87	1.32	0.84	0.85	1.48	1.09
AB01	M	14.1	16.19	18.1	11.68	10.76	8.54	10.23	8.87	11.98	9.27	5.53	5.79	8.39	5.86	5.02	7.5	6.18	5.3
AB02	M	9.85	19.98	27.87	16.63	12.19	9.29	9.49	8.29	8.7	6.53	3.86	3.54	5.84	4.38	6.7	5.98	4.47	6.56
AB05	M	7.77	11.63	8.73	6.38	8.74	5.01	5.17	4.97	3.92	3.9	6.03	3.78	3.36	4.06	3.84	3.37	4.7	3.77
AB06	M	11.62	15.23	11.93	22.08	15.46	13.48	13.24	10.18	6.64	8.19	11.05	9.83	9.72	9.81	10.83	10.06	10.77	10.51
AB09	M	20.15	26.53	35.08	22.9	14.16	8.49	4.05	7.56	7.44	1.99	2.18	3.02	2.37	1.34	1.35	2.44	2	1.85
AB10	M	16.14	5.37	4.32	9.07	11.99	9.66	4.08	7.84	2.45	4.35	3.76	5.44	1.37	2.82	4	3.02	4.09	3.44
AB13	M	6.55	11.21	17.39	6.86	6.6	4.55	4.53	4.51	4.19	2.6	3.6	2.06	2.78	2.99	2.44	2.63	2.51	2.44
AE01	M	22.34	29.26	9.8	9.35	10.13	6.5	6.68	5.1	3.39	3.36	3.45	3.53	3.51	2.93	2.92	2.18	3.87	3.14
AE13	M	17.98	12.1	14.31	9.21	5.28	3.7	1.34	1.88	3.48	5.79	4.14	3.9	2.66	5.19	4.95	2.8	5.26	4.92
AE14	M	13.49	11.98	10.25	7.87	4.08	5.49	7.01	2.32	2.44	3.52	3.04	4.51	3.29	2.29	2.64	2.74	3.59	3.24
AG01	M	15.54	10.57	10.7	10.28	9.77	10.09	14.93	9.34	5.5	7.2	3.9	6.3	3.86	7.73	5.26	6.73	5.2	5.36
AG02	M	20.79	21.59	12.27	9.23	8.87	10.72	12.76	7.33	6.31	6.96	6.55	5.33	4.13	5.39	4.73	8.09	6.12	5.2
AG05	M	8.43	9.84	13.55	12.45	8.25	5.86	9.31	5.82	7.67	7.71	4.99	4.63	2.9	4.97	5.46	7.01	5.37	4.41
AG06	M	14.49	14.97	16.88	13.43	8.84	6.29	6.58	3.99	2.88	3.41	3.11	4.28	1.98	3.81	4.35	7.68	5.32	5.07
AG07	M	12.29	5.07	7.12	11.61	7.16	3.49	0.97	0.98	1.6	1.12	6.82	5.79	8.2	3.54	2.5	4.95	2.19	2.13
AG09	M	9.56	11.42	1.43	3.73	0.6	2.51	1.09	2.22	1.56	1.15	1.06	2.41	3.26	2.23	2.12	1.25	2.3	2.52
AG10	M	3.63	2.27	3.12	1.38	0.8	0.84	1.65	2.65	1.35	3.28	4.24	6.34	5.77	6.74	4.55	6.91	4.68	8.06
AG25	M	7.37	12.78	12.67	20.96	21.13	6.72	8.22	6.51	8.31	5.94	3.64	3.04	3.36	3.44	3.36	3.15	3.53	3.44
AG26	M	17.7	13.73	16.48	19.08	18.69	18.6	10.67	9.96	6.04	5.84	4.99	5.24	4.88	5.05	5.24	4.57	4.9	5.79
AH02	M	17.03	28.57	39.67	27.68	23.29	24.14	12.72	16.98	29.29	19.76	11.99	12.99	11.11	14.66	15.21	10.05	11.44	10.27
AH03	M	16.99	17.96	26.97	13.98	11.44	10.26	6.66	5.44	8.16	8.5	5.47	4.22	4.87	4.84	4.74	4.56	3.01	4.3
AH04	M	24.76	29.63	28.19	17.24	17.94	10.35	8.39	7.79	15.88	10.8	6.05	6.53	4.17	6.31	6.11	2.89	5.87	5.51
AH05	M	12.19	22.11	33.07	26.82	24.14	16.38	9.66	11.2	14.88	10.44	8.08	7.62	7.07	4.81	6.11	7.14	5.39	12.12
AH06	M	22.63	23.59	26.03	12.65	8.4	5.22	4.64	4.85	8.86	7.75	4.28	5.38	4.28	3.6	2.84	5.65	3.79	3.97
AH08	M	14.78	15.93	19.48	16.49	9.1	9.18	7.8	10.99	17.65	10.34	7.49	5.53	5.33	6.62	6.77	4.76	6.34	7.53
AH12	M	6.37	1.51	0.17	1.06	0.24	0.5	0.26	0.86	0.42	0.68	0.52	0.62	0.61	1.76	4.15	4.04	0.36	0.84
AH13	M	17.96	32.3	41.97	29.24	14.72	22.63	13.04	10.59	17.43	21.49	14.83	10.09	10.98	7.85	8.63	9.26	10.35	10.68
AH14	M	9.36	22.82	25.99	24.86	19.83	14.12	10.13	12.42	15.9	16.5	10.28	7.91	8.29	8.12	7.61	6.54	6.13	10.41
AH17	M	20.11	32.1	30.41	17.37	11.21	10.87	5.84	8.33	10.78	9.83	6.25	5.72	6.52	7.22	5.13	5.35	5.59	5.59
AH18	M	17.94	20.28	18.17	14.49	12.51	9.72	6.84	8.31	20.48	13.07	6.48	7.39	8.27	9.46	8.77	8.23	12.24	12.44
AH19	M	15.72	22.8	30.27	19.47	10.17	6.28	5.46	4.54	11.5	13.73	9.8	7.27	6.91	6.4	7.89	11.34	10.28	9.34
AH20	M	19.44	30.28	25.84	14.49	11.03	9.03	6.24	5.79	11.1	8.41	4.96	4.76	3.85	4.87	4.91	5.71	8.16	3.85
Discrimination Ratio
RatID#	Sex	Bin-1	Bin-2	Bin-3	Bin-4	Bin-5	Bin-6	Bin-7	Bin-8	Bin-9	Bin-10	Bin-11	Bin-12	Bin-13	Bin-14	Bin-15	Bin-16	Bin-17	Bin-18
AB03	F	0.510693	0.518494	0.568315	0.589841	0.620484	0.585246	0.584625	0.586845	0.68536	0.672748	0.757433	0.678593	0.743725	0.635462	0.632057	0.691073	0.610485	0.620273
AB04	F	0.433944	0.489851	0.507599	0.515907	0.520025	0.528032	0.494176	0.52519	0.51867	0.600919	0.493087	0.607031	0.553914	0.559134	0.577346	0.517269	0.548146	0.546113
AB07	F	0.494272	0.487803	0.50195	0.512268	0.512314	0.535757	0.53833	0.587246	0.587217	0.741135	0.759676	0.743507	0.774193	0.785496	0.806418	0.810232	0.802564	0.806018
AB08	F	0.464564	0.494307	0.500495	0.511902	0.519221	0.550355	0.557942	0.589625	0.608854	0.706414	0.733952	0.742676	0.738085	0.76231	0.799474	0.774828	0.765195	0.770035
AB11	F	0.472031	0.535389	0.540323	0.530281	0.5369	0.500335	0.537337	0.553201	0.587913	0.591481	0.657301	0.646082	0.595937	0.55416	0.622018	0.574918	0.574617	0.587082
AB12	F	0.288119	0.475838	0.517129	0.515724	0.476663	0.49771	0.54519	0.581346	0.520649	0.536322	0.594402	0.446474	0.493873	0.517696	0.465824	0.501377	0.485055	0.474427
AB14	F	0.481298	0.500067	0.501599	0.523357	0.512739	0.51929	0.526803	0.533717	0.557127	0.580029	0.598836	0.567312	0.629873	0.618777	0.635418	0.628808	0.628926	0.628988
AB15	F	0.577978	0.505217	0.504028	0.529601	0.503762	0.540773	0.552925	0.608835	0.683018	0.644796	0.755103	0.762387	0.762434	0.803689	0.828398	0.812013	0.817631	0.817289
AB16	F	0.456178	0.497392	0.511553	0.535979	0.505063	0.512773	0.62939	0.603315	0.6725	0.719431	0.703091	0.759254	0.712213	0.798273	0.787012	0.772833	0.803448	0.796641
AE02	F	0.484279	0.508252	0.51869	0.508937	0.512638	0.516277	0.510112	0.563917	0.545441	0.556298	0.551436	0.551731	0.551712	0.551712	0.551712	0.551712	0.551712	0.551712
AE03	F	0.442664	0.410307	0.455139	0.57908	0.512883	0.339452	0.530593	0.289441	0.531994	0.492048	0.437324	0.439103	0.439094	0.439073	0.439077	0.439077	0.439077	0.439077
AE04	F	0.461139	0.506109	0.576856	0.523688	0.425176	0.310599	0.349849	0.202653	0.348657	0.37872	0.371563	0.370956	0.371044	0.371036	0.371037	0.371037	0.371037	0.371037
AE15	F	0.490044	0.56829	0.511785	0.518968	0.52492	0.579506	0.592784	0.61485	0.611797	0.613333	0.623793	0.623617	0.623625	0.623625	0.623625	0.623625	0.623625	0.623625
AE16	F	0.513383	0.478099	0.549849	0.511763	0.518492	0.546066	0.471358	0.50777	0.520511	0.552139	0.559384	0.559392	0.559386	0.559387	0.559387	0.559387	0.559387	0.559387
AG03	F	0.415468	0.517414	0.500043	0.548173	0.517874	0.486389	0.521134	0.531639	0.544735	0.534063	0.608781	0.727258	0.699414	0.698082	0.61839	0.692419	0.721459	0.718904
AG04	F	0.365921	0.51152	0.510827	0.504859	0.513335	0.503226	0.509715	0.493785	0.50932	0.496949	0.525052	0.529617	0.529319	0.545434	0.509236	0.523807	0.510465	0.502465
AG08	F	0.238187	0.478327	0.501941	0.521049	0.61097	0.784683	0.682306	0.692181	0.762408	0.789679	0.753924	0.79783	0.855518	0.864921	0.899536	0.864437	0.871748	0.89465
AG11	F	0.387116	0.51864	0.493591	0.496113	0.497626	0.516361	0.506778	0.507705	0.528335	0.543055	0.498811	0.519599	0.513576	0.560045	0.576014	0.646595	0.640445	0.651678
AG12	F	0.294579	0.486768	0.489152	0.506556	0.497855	0.532987	0.533456	0.482677	0.526027	0.551426	0.542323	0.5436	0.56398	0.612264	0.551028	0.601834	0.658688	0.671017
AH01	F	0.518535	0.521328	0.499265	0.497912	0.530368	0.486122	0.501523	0.508159	0.533005	0.514731	0.553604	0.581602	0.614659	0.648208	0.664261	0.674994	0.683094	0.680314
AH07	F	0.385406	0.46701	0.454853	0.593719	0.496225	0.503917	0.505481	0.501306	0.503834	0.511021	0.520752	0.577821	0.585245	0.605346	0.641315	0.673731	0.74976	0.71075
AH09	F	0.45584	0.489142	0.51644	0.554561	0.539103	0.562387	0.60584	0.637165	0.635949	0.607652	0.624804	0.729779	0.60033	0.634966	0.632879	0.686195	0.733453	0.68294
AH10	F	0.469847	0.458434	0.51159	0.512942	0.516651	0.492836	0.474762	0.496987	0.485645	0.48507	0.429839	0.493941	0.495455	0.507276	0.556786	0.58238	0.53011	0.508368
AH11	F	0.460224	0.47629	0.475563	0.488795	0.442863	0.470759	0.517389	0.535174	0.532715	0.622636	0.560968	0.551506	0.573656	0.659788	0.640968	0.579614	0.886709	0.807899
AH15	F	0.399636	0.558078	0.493422	0.487029	0.499102	0.50208	0.490266	0.499125	0.519614	0.497852	0.503968	0.503916	0.504221	0.513025	0.516125	0.513123	0.529762	0.533871
AH16	F	0.539601	0.514458	0.485451	0.500344	0.507858	0.508919	0.494247	0.505015	0.512714	0.50231	0.500822	0.533587	0.520666	0.49858	0.525758	0.515698	0.539951	0.532521
AH21	F	0.47285	0.522138	0.473598	0.474958	0.485174	0.500133	0.512286	0.516052	0.54737	0.543043	0.560584	0.572	0.591484	0.608351	0.584274	0.624813	0.661784	0.662984
AH22	F	0.491026	0.530643	0.491009	0.49965	0.497799	0.50321	0.507009	0.516721	0.536866	0.541829	0.612647	0.650042	0.697038	0.708423	0.684806	0.691192	0.757979	0.749692
AH23	F	0.594381	0.522954	0.499589	0.499703	0.492858	0.526817	0.517191	0.553373	0.519295	0.574067	0.588819	0.669831	0.7137	0.70345	0.871267	0.86374	0.864584	0.897294
AH24	F	0.540605	0.507659	0.505377	0.499192	0.503981	0.519191	0.513865	0.526236	0.530795	0.509944	0.533498	0.5669	0.620025	0.596873	0.659234	0.677543	0.705386	0.772576
AB01	M	0.496858	0.496156	0.518358	0.557545	0.547505	0.549117	0.566729	0.559145	0.640951	0.76786	0.808078	0.828218	0.82131	0.862655	0.86641	0.845028	0.86954	0.899299
AB02	M	0.390373	0.523103	0.491639	0.477353	0.509946	0.515605	0.528921	0.55557	0.55907	0.539864	0.676429	0.639008	0.647315	0.718857	0.82606	0.832576	0.845	0.86373
AB05	M	0.550159	0.505602	0.501251	0.52263	0.529931	0.530389	0.514218	0.55468	0.542953	0.631438	0.663252	0.69699	0.761347	0.765106	0.785907	0.783669	0.794749	0.798963
AB06	M	0.323492	0.484262	0.531274	0.508543	0.514589	0.531908	0.547819	0.565814	0.606317	0.642621	0.676218	0.727388	0.73289	0.764411	0.819517	0.801204	0.835574	0.830623
AB09	M	0.549826	0.507596	0.495063	0.496458	0.419025	0.418735	0.527228	0.564426	0.590091	0.604232	0.709574	0.641627	0.673401	0.684297	0.72123	0.726252	0.716788	0.719225
AB10	M	0.638366	0.508661	0.526472	0.496037	0.527327	0.563983	0.619109	0.573935	0.640271	0.719972	0.754068	0.721102	0.749934	0.743808	0.764924	0.745719	0.767376	0.747131
AB13	M	0.442521	0.475939	0.540909	0.525984	0.641327	0.742975	0.806413	0.762597	0.766617	0.87805	0.8298	0.861452	0.884754	0.894265	0.908246	0.904336	0.909692	0.908424
AE01	M	0.423889	0.490647	0.518754	0.507817	0.539815	0.599526	0.672644	0.71663	0.739326	0.800157	0.797953	0.797912	0.797909	0.797909	0.797909	0.797909	0.797909	0.797909
AE13	M	0.518547	0.507496	0.493691	0.507305	0.51903	0.570692	0.623699	0.6334	0.633342	0.604061	0.614763	0.614565	0.614561	0.614564	0.614564	0.614564	0.614564	0.614564
AE14	M	0.464374	0.522731	0.496389	0.542386	0.570875	0.617425	0.652205	0.746897	0.755468	0.740341	0.744644	0.744756	0.744728	0.744732	0.744731	0.744731	0.744731	0.744731
AG01	M	0.294134	0.437202	0.541744	0.526923	0.579408	0.53424	0.542235	0.568715	0.602495	0.54958	0.557795	0.625684	0.669683	0.692967	0.712047	0.757755	0.789771	0.787732
AG02	M	0.300125	0.481979	0.492187	0.523642	0.539996	0.54693	0.577822	0.597673	0.663889	0.657706	0.76907	0.806068	0.790855	0.79855	0.798732	0.858904	0.891052	0.88383
AG05	M	0.296223	0.457325	0.50804	0.491239	0.50744	0.527463	0.517157	0.57267	0.559677	0.643647	0.725595	0.622825	0.733131	0.700281	0.691869	0.715296	0.766138	0.822268
AG06	M	0.359397	0.583543	0.532894	0.464654	0.536958	0.625102	0.620033	0.581197	0.622331	0.618617	0.705571	0.650109	0.734096	0.787808	0.760133	0.72506	0.79008	0.809809
AG07	M	0.361831	0.532929	0.542328	0.54084	0.634341	0.775129	0.842246	0.814277	0.882232	0.806094	0.822022	0.78208	0.812766	0.872319	0.858206	0.885626	0.891562	0.841617
AG09	M	0.355188	0.51004	0.498212	0.528523	0.546029	0.573758	0.622586	0.64318	0.668503	0.69568	0.802411	0.764235	0.813853	0.775165	0.793645	0.87598	0.895465	0.892322
AG10	M	0.354366	0.444298	0.529186	0.520489	0.561718	0.606571	0.704505	0.610884	0.64329	0.677036	0.763394	0.659688	0.703348	0.711669	0.704324	0.675622	0.70619	0.707116
AG25	M	0.209403	0.505932	0.460923	0.502623	0.479166	0.500599	0.510792	0.509868	0.53873	0.540452	0.664286	0.73302	0.717162	0.766856	0.809658	0.802169	0.806054	0.804259
AG26	M	0.406216	0.43363	0.466177	0.466498	0.498106	0.512741	0.543582	0.560825	0.597769	0.635654	0.713934	0.712755	0.73891	0.754156	0.782858	0.776793	0.757191	0.77542
AH02	M	0.445466	0.446985	0.481812	0.49715	0.519407	0.510109	0.512106	0.495277	0.499746	0.505671	0.530664	0.539277	0.512006	0.551644	0.548936	0.581378	0.606656	0.560961
AH03	M	0.285722	0.47624	0.478875	0.48786	0.427965	0.452965	0.499231	0.518272	0.541236	0.527162	0.431886	0.519669	0.564358	0.548388	0.505503	0.62947	0.625681	0.49787
AH04	M	0.475825	0.472211	0.499187	0.521384	0.507929	0.506617	0.506635	0.517267	0.523827	0.511995	0.501395	0.502406	0.566909	0.536009	0.567489	0.588591	0.542317	0.571906
AH05	M	0.472879	0.492986	0.492655	0.53337	0.496426	0.512148	0.519143	0.552938	0.540557	0.575659	0.60751	0.686808	0.683481	0.783724	0.783414	0.796146	0.763326	0.783299
AH06	M	0.397992	0.480164	0.533085	0.564644	0.591583	0.615956	0.656238	0.621785	0.66024	0.642818	0.744001	0.726933	0.773441	0.751907	0.782194	0.812308	0.778103	0.814091
AH08	M	0.503176	0.584632	0.623882	0.589612	0.607128	0.585221	0.606413	0.627645	0.656414	0.702161	0.775609	0.785934	0.813256	0.845826	0.816161	0.859175	0.846992	0.852605
AH12	M	0.459865	0.527743	0.574915	0.638908	0.691111	0.718236	0.705907	0.751152	0.829496	0.845798	0.830166	0.905261	0.857297	0.819158	0.772143	0.77836	0.831754	0.831984
AH13	M	0.522688	0.514201	0.501186	0.50824	0.540073	0.52457	0.522387	0.589391	0.610538	0.605833	0.64298	0.671463	0.695697	0.719182	0.722939	0.729205	0.739666	0.761209
AH14	M	0.40478	0.486743	0.399875	0.488389	0.479042	0.500013	0.478666	0.520773	0.502075	0.526192	0.546031	0.505164	0.594838	0.620471	0.59599	0.602615	0.581984	0.634359
AH17	M	0.473667	0.498404	0.492984	0.479191	0.524583	0.48685	0.508005	0.516435	0.550795	0.606316	0.625393	0.603561	0.646243	0.639962	0.70636	0.791128	0.723117	0.732903
AH18	M	0.526183	0.488883	0.476107	0.512672	0.491401	0.528456	0.479976	0.490894	0.52513	0.528172	0.530706	0.576751	0.551087	0.530304	0.565354	0.613181	0.613423	0.594287
AH19	M	0.462127	0.47518	0.495314	0.475506	0.524393	0.571306	0.62878	0.686975	0.681802	0.714004	0.750408	0.768022	0.781915	0.775631	0.734295	0.784533	0.807112	0.777257
AH20	M	0.461901	0.489377	0.448458	0.502505	0.5423	0.504319	0.513897	0.501329	0.55739	0.551406	0.604391	0.674469	0.666738	0.687045	0.693581	0.677791	0.646358	0.748845

## Sheet: Simple
Rewarded Trials
RatID#	Sex	Bin-1	Bin-2	Bin-3	Bin-4	Bin-5	Bin-6	Bin-7	Bin-8
AA11	F	26.49	63.96	80.79	90.39	90.95	91.06	80.69	80.55
AA12	F	5.05	11.27	58.02	68.36	82.47	79.32	74.56	78.07
AA23	F	18.31	80.95	86.03	89.84	92.25	91.2	88.95	92.43
AA24	F	46.16	69.57	86.71	85.84	88.24	89.4	91.03	93.1
AE07	F	16.77	41.66	64.84	55	66.2	74.44	83.25	88.95
AE08	F	41.13	53.04	59.58	63.03	51.54	48.53	68.41	62.9
AE19	F	48.92	79.1	84.31	83.55	89.45	89.22	87.03	93.73
AE20	F	36.79	80.25	73.89	67.33	72.33	67.63	63.29	64.48
AG19	F	20.09	75.28	79.45	82.29	67.83	68.9	68.6	63
AG20	F	8.79	58.71	61.77	56.07	49.45	44.9	53.92	63.84
AG23	F	9.81	53.9	76.26	89.68	89.63	83.46	86.83	76.88
AG24	F	32	84.21	88.39	93.59	90.03	92.46	86.25	89.05
AA09	M	49.23	64.95	53.45	40.13	43.6	25.47	29.14	45.72
AA10	M	23.19	54.49	86.44	71.09	70.34	75.86	78.86	78.9
AA21	M	68.39	51.85	40.68	18.73	8.24	14.87	14.46	13.19
AA22	M	57.23	60.15	49.2	47.59	45.06	42.6	53.05	59
AE05	M	18.29	60.57	67.64	69.14	66.63	67.14	50.12	47.59
AE06	M	12.68	32.65	70.2	71.87	90.51	85.1	84.82	90.26
AE17	M	67.33	73.97	88.62	76.55	70.75	57.56	79.92	79.17
AE18	M	46.97	66.64	78.52	49.97	42.63	67.53	67.03	60.55
AG21	M	53.58	64	51.91	64.12	67.21	66.07	55.51	74.4
AG22	M	52	86.89	75.22	62.95	56.21	53.28	46.52	44.07
AG29	M	16.31	80.87	80.59	83.28	77.01	70.93	57.85	67.56
AG30	M	24.58	86.74	88.29	92.73	86.44	80.92	84	87.44
AI01	M	46.29	88.94	86.72	77.91	69.94	66.13	64.42	75.83
AI02	M	29.74	86.25	83.16	82.53	89.42	85.85	88.63	90.63
AI05	M	14.84	74.58	94.65	93.87	94.88	72.89	94.6	96.74
AI06	M	47.24	91.73	86.57	90.31	86.07	67.55	89.54	78.69
AI07	M	19.04	76.87	88.66	89.74	92.55	88.98	91.64	83.68
AI08	M	39.16	88.38	72.98	89.97	74.8	79.58	69.96	75.85
AI09	M	27.49	88.32	96.92	96.81	88.46	93.6	92.49	97.38
AI10	M	42.22	89.88	90.01	89.23	93.9	94.79	87.95	93.97
AI11	M	42.28	94.29	82.08	88.21	69.55	76.47	86.62	86.53
AI12	M	28.13	83.31	81.99	69.28	67.62	63.88	70.88	80.34
Nonrewarded Trials
RatID#	Sex	Bin-1	Bin-2	Bin-3	Bin-4	Bin-5	Bin-6	Bin-7	Bin-8
AA11	F	12.74	4.69	4.06	6.77	7.9	5.56	5.07	3.74
AA12	F	4.27	4.12	5.69	3.57	3.51	3.45	1.12	1.06
AA23	F	6.53	3.3	1.86	2.55	3.62	1.28	2.06	2.93
AA24	F	17.41	9.05	1.64	5.39	3.5	5.77	1.89	0.76
AE07	F	4.5	11.72	16.7	14.98	13.06	14.01	13.21	18.25
AE08	F	7.09	2.05	0.69	2.59	1.14	2.6	2.25	2.15
AE19	F	15.3	7.28	4.71	5.76	8.12	6.52	6.22	8.46
AE20	F	15.37	10.25	6.16	10.34	7.54	4.17	2.39	5.42
AG19	F	9.08	4.91	3.88	5.62	4.61	5.41	2.7	3.91
AG20	F	10.17	6.69	6.59	4.77	4.33	8.11	5.85	7.39
AG23	F	7.14	7.18	5.29	3.49	5.92	4.23	7.72	2.96
AG24	F	6.74	6.57	4.14	3.62	6.03	6.99	5.1	6.52
AA09	M	12.14	3.93	3.87	5.43	0.6	1.32	1.18	1.06
AA10	M	5.41	3.16	5.29	5.77	4.4	3.09	2.42	4.27
AA21	M	13.02	2.04	1.16	0.77	0.25	0.89	1.12	0.88
AA22	M	12.54	1.54	0.68	1.51	0.45	0.38	0.27	0.16
AE05	M	10.22	6.69	11.21	16.63	11.74	9.44	7.65	14.77
AE06	M	8.32	6.08	7.12	4.83	7.07	5.55	7.32	5.06
AE17	M	12.48	4.56	1.81	0.94	0.23	2	1	0.23
AE18	M	10.78	5.49	3.67	2.73	1.56	0.97	2.12	1.74
AG21	M	4.06	1.48	1.79	0.33	0.56	0.3	0.22	2.5
AG22	M	13.42	6.95	5.72	7.25	2.08	3.43	2.83	3.05
AG29	M	12.52	7.45	8.48	5.32	6.25	8.79	10.92	7
AG30	M	7.39	4.6	2.28	1.71	3.38	2.1	2.88	4.12
AI01	M	12.54	3.19	6.6	8.26	6.26	6.43	5.82	5.47
AI02	M	16.3	11.54	5.84	7.46	10.19	3.42	4.63	4.32
AI05	M	6.39	10.02	9.68	8.22	10.43	6.54	4.36	2.97
AI06	M	19.12	6.91	5.33	9.67	7.85	3.9	7.15	6.86
AI07	M	10.48	7.97	14.89	11.14	9.91	10.7	8.26	7.5
AI08	M	16.58	13.3	8.38	10.29	5.35	7.35	6.57	6.4
AI09	M	14.23	15.01	12.48	17.95	5.81	7.54	7.37	8.01
AI10	M	17.48	15.76	7.88	8.15	11.44	6.75	7.46	8.54
AI11	M	11.64	3.99	3.9	3.23	5.03	7.09	5.19	6.11
AI12	M	7.67	6.69	9.5	9.02	12.02	8.26	8.42	9.83
Pre-CS
RatID#	Sex	Bin-1	Bin-2	Bin-3	Bin-4	Bin-5	Bin-6	Bin-7	Bin-8
AA11	F	21.34	10.53	7.06	10.43	9.27	10.54	5.57	8.58
AA12	F	11.05	11.35	8.99	4.81	6.65	6.04	5.34	7.47
AA23	F	16.14	7.21	3.49	3.84	6	4.41	3.8	3.67
AA24	F	26.43	9.01	4.53	6.79	4.09	8.77	8.55	6.33
AE07	F	7.83	9.96	24.55	15.34	21.56	22.11	17.99	22.03
AE08	F	7.67	2.8	2.38	2.87	2.07	2.2	2.97	5.03
AE19	F	22.78	10.72	9.15	7.05	10.85	9.97	9.83	8.4
AE20	F	30.85	15.06	11.92	19.43	10.92	8.16	5.62	8.03
AG19	F	20.55	10.69	7.66	8.39	8.22	7.6	3.56	3.97
AG20	F	15.67	11.42	5.85	5.5	8.18	7.37	9.27	7.99
AG23	F	15.99	16.36	10.43	6.11	13.88	10.06	18.64	9.11
AG24	F	23.88	10.37	7.2	8.38	16.48	12.11	9.84	11.69
AA09	M	14.02	4.9	4.63	4.44	0.94	1.19	1.43	0.82
AA10	M	4.11	3.67	2.43	3.42	2.69	2.01	2.34	2.33
AA21	M	10.28	2.79	2.15	1.31	0.78	1.43	1.71	1.95
AA22	M	11.39	1.28	1.56	1.94	1.29	0.17	1.05	0.56
AE05	M	18.22	13.69	13.84	18.31	14.77	14.7	9.07	14.48
AE06	M	22.56	20.94	14.32	9.91	14.24	11.3	9.31	7.34
AE17	M	9.86	2.63	0.89	0.49	0.99	1.88	1.77	1.59
AE18	M	6.92	7.97	5.44	5.06	2.17	3.68	3.85	3.18
AG21	M	7.99	1.31	1.29	1.25	0.49	1.64	0.46	4.4
AG22	M	12.47	16.06	9.23	8.8	13.73	6.51	5.29	11.63
AG29	M	19.24	16.71	11.26	10.84	10.54	19.56	17.05	14.76
AG30	M	11.35	6.81	4.74	6.36	5.84	2.99	3.64	5.45
AI01	M	24.71	14.61	11.02	10.44	7.49	8.2	7.29	5.78
AI02	M	31.65	19.74	9.57	8.83	10.01	7.12	5.84	5.54
AI05	M	18.21	20.89	17.59	12.83	8.28	8.83	4.33	3.1
AI06	M	34.01	17.79	14.04	15.88	12.57	6.48	9.01	8.89
AI07	M	21.02	24.58	20.57	14.31	12.76	11.5	6.97	8.41
AI08	M	23.67	15.95	12.88	10.44	6.65	6.73	6.79	8.39
AI09	M	26.64	29.3	18.63	17.35	7.67	10.13	9.76	8.83
AI10	M	27.15	30.13	16.16	7.96	12.04	8.66	7.44	10.63
AI11	M	20.7	5.7	6.48	4.65	7.41	8.32	5.93	3.95
AI12	M	16.95	11.77	12.54	11.85	10.7	9.65	6.33	8.15
Discrimination Ratio
RatID#	Sex	Bin-1	Bin-2	Bin-3	Bin-4	Bin-5	Bin-6	Bin-7	Bin-8
AA11	F	0.675283	0.9317	0.952183	0.930311	0.920118	0.942415	0.940913	0.955657
AA12	F	0.541923	0.732402	0.910639	0.950341	0.959182	0.958317	0.985207	0.986645
AA23	F	0.737216	0.960792	0.978834	0.972397	0.962267	0.98616	0.977419	0.969306
AA24	F	0.7261	0.884872	0.98142	0.940888	0.961809	0.939398	0.979643	0.991855
AE07	F	0.788225	0.780474	0.795237	0.785927	0.83523	0.841631	0.863038	0.829745
AE08	F	0.852971	0.962817	0.988598	0.96046	0.978406	0.949115	0.9681	0.966969
AE19	F	0.761719	0.915685	0.947094	0.935475	0.916752	0.931928	0.933251	0.917241
AE20	F	0.705398	0.886701	0.923083	0.866888	0.90558	0.941928	0.963666	0.922485
AG19	F	0.688787	0.938816	0.953451	0.936101	0.936361	0.927228	0.962064	0.941515
AG20	F	0.463707	0.897722	0.903607	0.921605	0.919523	0.847076	0.902187	0.8963
AG23	F	0.578731	0.882471	0.935117	0.962524	0.93806	0.951758	0.918395	0.962884
AG24	F	0.825986	0.927677	0.955237	0.962766	0.937194	0.929751	0.944173	0.931754
AA09	M	0.802173	0.942979	0.932478	0.880926	0.986343	0.950803	0.961074	0.977297
AA10	M	0.810865	0.945215	0.942365	0.924902	0.94119	0.960836	0.970263	0.948603
AA21	M	0.840042	0.962169	0.97217	0.960684	0.970109	0.943525	0.928391	0.937634
AA22	M	0.820329	0.975085	0.986359	0.969347	0.990092	0.991081	0.994983	0.997279
AE05	M	0.641407	0.900474	0.857789	0.80612	0.850206	0.876723	0.867524	0.763122
AE06	M	0.603916	0.843089	0.907896	0.937049	0.927505	0.938736	0.92052	0.946904
AE17	M	0.843678	0.941994	0.979941	0.987822	0.996812	0.966383	0.987637	0.997139
AE18	M	0.813305	0.923936	0.955387	0.948158	0.964687	0.98589	0.969299	0.972127
AG21	M	0.929552	0.977466	0.966722	0.994882	0.9918	0.99548	0.996106	0.967543
AG22	M	0.794872	0.925913	0.929346	0.896733	0.96426	0.93958	0.942571	0.935212
AG29	M	0.565841	0.915596	0.904777	0.939963	0.924875	0.889769	0.841227	0.906128
AG30	M	0.76897	0.949641	0.974797	0.981933	0.962415	0.974705	0.966881	0.954994
AI01	M	0.786832	0.965365	0.929309	0.904146	0.91779	0.911421	0.917085	0.932667
AI02	M	0.646053	0.881986	0.93434	0.917115	0.897664	0.961742	0.950405	0.954538
AI05	M	0.699125	0.881595	0.907214	0.919494	0.900997	0.917646	0.955896	0.970229
AI06	M	0.711852	0.929904	0.941989	0.903268	0.916392	0.945374	0.926043	0.919767
AI07	M	0.644989	0.9061	0.856178	0.889606	0.903259	0.892641	0.917285	0.917736
AI08	M	0.702511	0.869237	0.897005	0.897372	0.933221	0.915413	0.914172	0.922234
AI09	M	0.658842	0.854771	0.885958	0.843615	0.938413	0.925446	0.926238	0.924043
AI10	M	0.707238	0.850811	0.919519	0.916343	0.891414	0.933512	0.921769	0.916662
AI11	M	0.78421	0.959444	0.954678	0.964719	0.932551	0.915116	0.943437	0.934056
AI12	M	0.78576	0.925643	0.896176	0.884778	0.84905	0.885508	0.893826	0.890948

## Sheet: NoDiscr
Rewarded Trials
RatID#	Sex	Bin-1	Bin-2	Bin-3	Bin-4	Bin-5	Bin-6	Bin-7	Bin-8
AA07	F	28.64	65.51	94.88	74.51	64.16	50.92	40.18	43.27
AA08	F	14.71	20.78	23.47	55.97	68.24	62.81	42.07	38.64
AA19	F	29.2	57	65.45	75.03	96.89	86.96	80.8	85.66
AA20	F	17.45	55.51	53.02	82.12	88.76	88.79	67.89	67.56
AE11	F	11.44	10.8	29.78	53.17	64.56	56.06	61.31	68.31
AE12	F	10.48	30.71	57.86	54.92	31.38	50.21	52.8	53.16
AE23	F	7.87	4.22	8.57	7.65	14.2	49.78	70.83	49.6
AE24	F	5.42	5.39	3.8	4.94	21.2	32.66	28.94	36.17
AA05	M	15.3	41.24	51.28	45.82	62.78	58.31	54.56	52.21
AA06	M	31.79	74.92	81.02	89.01	92.06	85.81	81.37	86.28
AA17	M	27.5	50.15	78.66	85.96	86.74	71.19	76.42	78.38
AA18	M	5.35	17.38	23.77	72.51	82.2	83.36	85.14	92.05
AE09	M	17.48	20.6	31.91	32.25	42.97	46.29	49.95	41.17
AE10	M	44.18	68.32	78.62	88.48	91.42	87.03	78.97	88.95
AE21	M	12.19	4.39	8.42	4.85	9.42	8.3	3.71	2.96
AE22	M	18.85	24.38	29.27	28.32	31.92	33.52	33.06	44.32
Nonrewarded Trials
RatID#	Sex	Bin-1	Bin-2	Bin-3	Bin-4	Bin-5	Bin-6	Bin-7	Bin-8
AA07	F	31.5	75.18	94.16	77.76	70.1	64.2	49.31	52.84
AA08	F	20.93	26.65	28.04	59.97	58.89	50.38	35.59	35.97
AA19	F	25.04	57.62	55.36	72.21	93.34	92.23	78.73	83.6
AA20	F	15.58	58.25	38.86	56.77	61.78	68.56	52.73	36.18
AE11	F	13.48	13.3	35.25	56.46	68.97	55.83	63.32	73.14
AE12	F	12.27	30.51	57.25	49.46	34.87	49.85	49.53	56.51
AE23	F	7.29	4.39	6.82	8.33	16.11	53.82	69.16	59.64
AE24	F	3.47	2.77	3.2	7.36	17.43	19.24	25.23	39.67
AA05	M	14.49	36.31	48.43	45.17	63.55	64.04	63.27	57.42
AA06	M	31.72	69.36	81.95	88.31	90.72	79.69	75.34	72.71
AA17	M	21.69	44.71	70.33	82.66	81.19	70.61	68.87	68.59
AA18	M	4.52	13.12	20.07	61.3	75.8	76.35	80.79	83.39
AE09	M	12.45	23.69	35.81	36.18	44.13	48.02	45.38	38.29
AE10	M	47.19	68.41	73.96	84.73	88.98	85.51	85.72	92.99
AE21	M	10.24	4.77	7.76	4.62	8.92	9.21	4.31	3.01
AE22	M	16.65	21.06	30.03	24.98	32.37	30.22	30.09	39.78
Pre-CS
RatID#	Sex	Bin-1	Bin-2	Bin-3	Bin-4	Bin-5	Bin-6	Bin-7	Bin-8
AA07	F	14.67	14.16	11.34	5.46	4.36	4.22	3.4	3.93
AA08	F	14.27	6.39	5.67	7.79	14.04	9.84	11.41	6.76
AA19	F	14.56	10.3	5.76	7.23	5.45	5.87	5.43	3.45
AA20	F	9.43	11.96	5.42	8.59	9.07	8.84	5.51	1.8
AE11	F	8.85	5.35	9.25	13.92	7.18	8.55	8.59	18.73
AE12	F	4.75	5.55	3.52	5.45	6.55	4.88	12.62	15.63
AE23	F	11.21	6.77	6.68	7.8	8.78	15.06	24.33	15.44
AE24	F	8.86	12.35	8.94	7.41	12.3	12.85	7.45	15.12
AA05	M	9.54	9.14	6	6.49	7.83	6.66	10.99	11.02
AA06	M	15.18	19.24	5.58	5.39	5.53	4.65	6.2	6.5
AA17	M	14.02	5.15	10.18	13.99	17.23	12.03	5.86	7.06
AA18	M	5.95	3.97	4.06	12.64	12.45	8.78	12.91	12.96
AE09	M	17.89	16.47	9.55	8.8	11.39	8.11	4.19	5.94
AE10	M	39.72	41.35	32.8	39.59	37	29.15	24.63	33.9
AE21	M	3.37	0.88	1.08	0.46	0.7	0.11	0.19	0.84
AE22	M	8.64	4.4	4.22	4.81	5.04	2.91	2.42	4.41
Discrimination Ratio
RatID#	Sex	Bin-1	Bin-2	Bin-3	Bin-4	Bin-5	Bin-6	Bin-7	Bin-8
AA07	F	0.445967	0.467689	0.500968	0.489392	0.474941	0.443133	0.451142	0.44843
AA08	F	0.42508	0.437957	0.451232	0.461358	0.532668	0.55578	0.541083	0.519533
AA19	F	0.461727	0.497801	0.545167	0.513793	0.509229	0.483733	0.510578	0.506106
AA20	F	0.527513	0.488296	0.574175	0.588974	0.590395	0.564695	0.556752	0.651123
AE11	F	0.395774	0.432154	0.450419	0.484986	0.484238	0.504897	0.492746	0.483215
AE12	F	0.445847	0.48743	0.503867	0.525585	0.473367	0.50438	0.5171	0.484481
AE23	F	0.642853	0.364051	0.556198	0.494046	0.467803	0.476396	0.506209	0.449752
AE24	F	0.713512	0.60264	0.563002	0.365915	0.55622	0.619487	0.533645	0.470457
AA05	M	0.524822	0.537543	0.51506	0.507163	0.497933	0.475944	0.464344	0.476246
AA06	M	0.489444	0.519932	0.496701	0.5022	0.50362	0.518236	0.518994	0.54249
AA17	M	0.551206	0.526997	0.528179	0.50991	0.516757	0.501742	0.527103	0.53327
AA18	M	0.664954	0.565862	0.54568	0.539886	0.520551	0.522024	0.5137	0.525401
AE09	M	0.593448	0.46719	0.470547	0.471732	0.492575	0.489976	0.527839	0.518001
AE10	M	0.470887	0.500774	0.516059	0.510828	0.506533	0.504143	0.480251	0.488855
AE21	M	0.559376	0.486962	0.53203	0.515467	0.503958	0.467009	0.472984	0.497039
AE22	M	0.538365	0.543658	0.492653	0.53081	0.497034	0.520887	0.519614	0.526958

## Sheet: Ctx-dep O1-O2
Rewarded Trials
RatID#	Sex	Bin-1	Bin-2	Bin-3	Bin-4	Bin-5	Bin-6	Bin-7	Bin-8
AA03	F	8.94	25.18	71.74	74.38	59.58	57.01	69.1	60.17
AA04	F	4.48	35.16	62.7	75.7	73.75	76.32	79.12	69.69
AA15	F	6.13	19.45	44.44	53.34	54.68	62.52	55.23	54.81
AA16	F	15.97	35.39	48.54	77.14	79.18	70.87	74.36	70.64
AC03	F	3.9	5.65	38.23	69.47	51.82	62.59	72.25	82.98
AC04	F	3.75	20.37	30.35	31.27	37.09	36.32	46.65	60.11
AC07	F	5.09	30.96	37.84	58.11	74.65	91.45	87.11	94.55
AC08	F	11.08	58.6	88.38	89.57	90.41	95.01	90.12	96
AC11	F	8.93	23.96	69.28	79.47	77.2	76.42	85.43	92.78
AC12	F	17.14	46.58	57.37	66.21	51.64	54.94	61.12	64.07
AG15	F	12.2	43.86	51.34	57.43	62.57	68.96	77.07	76.34
AG16	F	14.76	18.91	52.28	65.89	76.13	85.86	78.79	82.47
AG27	F	13.57	57.32	44.65	45.68	47.81	48.41	45.29	55.28
AG28	F	40.64	75.47	88.6	88.46	72.15	49.68	43.75	57.03
AA01	M	20.66	32.1	42.95	70.81	69.34	76.27	82.58	77.1
AA02	M	9.93	26.36	59.25	78.59	81.49	80.58	79.78	81.97
AA13	M	51.85	86.2	86.42	88.17	85.47	81.86	86.88	87.34
AA14	M	34.15	44.92	51.85	68.2	81.44	81.13	79.03	77.01
AC01	M	22.01	61.78	72.87	79.34	82.33	90.48	93.16	95.35
AC02	M	32.05	83.2	89.24	91.39	90.09	92.83	96.15	98.18
AC05	M	30.18	69.36	88.13	96.71	97.43	99.34	94.86	95.29
AC06	M	10.08	29.17	47.73	52.43	52.06	43.15	55.05	74.57
AC09	M	38.24	56.64	80.44	83.33	83.38	85.36	83.63	90.49
AC10	M	14.88	44.41	78.42	90.06	82.21	85.88	93.75	88.17
AG13	M	9.34	26.26	40.76	47.55	53.37	61.52	59.93	71.97
AG14	M	23.01	33.6	43.12	61.63	57.71	38.95	37.2	41.18
AG17	M	13.32	11.74	12.52	35.64	46.01	60.95	73.73	79.15
AG18	M	28.84	39.94	46.04	61.3	67.42	74.06	82.5	83.24
Nonrewarded Trials
RatID#	Sex	Bin-1	Bin-2	Bin-3	Bin-4	Bin-5	Bin-6	Bin-7	Bin-8
AA03	F	10.1	9.85	14.75	16.14	8.74	10.02	8.87	12.45
AA04	F	6.88	34.46	52.33	42.2	39.13	20.98	22.71	29.54
AA15	F	5.37	10.21	13.37	15.28	11.28	8.57	10.08	9.71
AA16	F	9.64	13.4	19.72	25.78	21.52	18.57	15.11	5.59
AC03	F	5.36	3.24	26.99	38.09	39.57	36.55	41.24	33.75
AC04	F	5.88	20.84	25.21	18.56	18.63	19.13	23.62	35.03
AC07	F	7.35	30.38	33.88	38.69	28.55	24.06	21.59	13.96
AC08	F	14.57	48.55	52.92	44.45	36.7	30	27.35	30.96
AC11	F	8.99	22.56	48.97	56.46	30.53	28.43	32.88	23.44
AC12	F	19.73	43.83	31.48	23.95	7.18	7.69	7.9	3.79
AG15	F	11.77	37.42	36.12	38.4	33.79	36.72	36.31	43.05
AG16	F	12.85	18.34	42.96	49.15	47.75	55.1	42.56	40.61
AG27	F	12.29	53.48	32.62	36.09	29.36	24.98	17.99	24.48
AG28	F	36.39	78.19	82.94	80.88	67.34	43.32	32.18	47.91
AA01	M	23.62	24.34	18.27	23.35	17.32	26.59	22.83	17.87
AA02	M	11.52	15.91	22.42	27.17	21.97	24.71	12.53	24.76
AA13	M	52.18	76.08	55.39	36.46	19.28	11.36	17.02	8.63
AA14	M	35.84	34.74	26.8	30.44	24.79	26.74	21.84	13.01
AC01	M	22.49	37.81	47.56	38.86	40.17	41.94	34.61	19.36
AC02	M	33.08	61.2	61.29	56.9	44.71	30.48	39.21	31.16
AC05	M	32.15	50.49	48.66	40.97	31.81	29.76	24.12	18.7
AC06	M	6.78	27.6	26.44	28.34	13.92	10.91	17.56	18.32
AC09	M	38.79	53.87	53.18	54.66	47.05	36.49	38.19	35.9
AC10	M	13.84	35.92	38.82	40.88	27.29	23.92	17.97	8.79
AG13	M	9.28	25.01	36.08	47.42	41.35	37.06	26.88	39.77
AG14	M	21.92	22.17	31.15	37.3	23.42	21.64	12.87	15.78
AG17	M	14.69	8.58	8.34	14.73	23.14	23.86	27.21	22.58
AG18	M	27.32	35.61	29.12	24.41	21.13	19.1	17.93	18.99
Pre-CS
RatID#	Sex	Bin-1	Bin-2	Bin-3	Bin-4	Bin-5	Bin-6	Bin-7	Bin-8
AA03	F	13.11	3.91	2.85	2.41	3.53	4.36	6.61	3.64
AA04	F	8.77	8.09	5.15	3.27	2.64	3.32	2.9	4.36
AA15	F	6.49	5.17	5.88	4.57	5.37	4.02	5	2.6
AA16	F	11.22	4.38	5.92	4.83	4.27	4.95	2.77	2.97
AC03	F	6.87	5.93	15.48	7.88	9.23	8.26	8.79	8.92
AC04	F	9.87	10.61	9.34	10.8	8.07	10.18	5.97	6.82
AC07	F	4.41	15.03	10.85	9.69	3.56	2.61	4.02	1.75
AC08	F	12.55	18.2	10.42	11.45	9.48	8.36	7.94	5.18
AC11	F	8.83	12.36	16.96	8.87	3.73	5.42	5.72	4.03
AC12	F	8.97	14.76	11.49	7.48	4.35	4.32	3.96	3.6
AG15	F	12.85	9.13	6.88	6.33	6.75	3.71	5.93	4.56
AG16	F	13.08	12.77	20.21	17.09	21.86	15.86	15.57	10.77
AG27	F	12	16.37	7.92	5.48	6.47	5.28	5.18	6.31
AG28	F	24.45	22.07	11.38	13.09	16.47	9.44	7.5	12.67
AA01	M	24	16.47	11.4	5.87	4.05	6.25	9.82	4.82
AA02	M	10.44	9.9	11	6.26	4.82	3.7	2.51	3.17
AA13	M	31.9	15.85	9.47	9.1	7.08	5.98	7.76	4.44
AA14	M	27.89	14.65	6.94	7.76	13.24	15.44	8.65	5.93
AC01	M	15.44	22.86	15.79	13.65	16.76	13.22	13.99	10.06
AC02	M	20.92	23.18	18.02	16.84	15.8	10.73	10.73	9.41
AC05	M	15.04	12.33	17.22	15.27	11.7	11.88	9.64	9.24
AC06	M	11.9	20.48	16.43	14.65	10.43	10.36	13.68	14.38
AC09	M	21.47	14.73	11.47	7.1	8.46	7.4	7.88	4.77
AC10	M	13.27	20.15	14.89	9.51	6.7	9.88	6.82	4.68
AG13	M	18.44	16.01	11.37	6.96	9.11	9.35	9.69	6.28
AG14	M	15.34	16.34	13.33	8.21	6.17	6.55	5.92	6.3
AG17	M	9.57	4.78	7.35	6.23	6.48	6.03	3.57	7.17
AG18	M	13.28	7.8	6.54	9.21	8.46	4.4	5.82	5.58
Discrimination Ratio
RatID#	Sex	Bin-1	Bin-2	Bin-3	Bin-4	Bin-5	Bin-6	Bin-7	Bin-8
AA03	F	0.502042	0.711024	0.831481	0.825118	0.873833	0.849435	0.88673	0.829754
AA04	F	0.421391	0.501426	0.543853	0.645306	0.657522	0.803852	0.77817	0.700168
AA15	F	0.40067	0.695695	0.769606	0.776651	0.829947	0.879334	0.84652	0.85158
AA16	F	0.467219	0.718574	0.712955	0.750432	0.789111	0.792424	0.834531	0.927176
AC03	F	0.398272	0.603003	0.593873	0.647824	0.578813	0.631921	0.634884	0.710587
AC04	F	0.315858	0.494819	0.543499	0.641896	0.682441	0.657806	0.66417	0.630198
AC07	F	0.228201	0.504518	0.527103	0.596416	0.722294	0.794485	0.80484	0.872503
AC08	F	0.353459	0.543652	0.626059	0.670001	0.719006	0.761574	0.770122	0.756216
AC11	F	0.545735	0.508437	0.588882	0.585987	0.717234	0.729283	0.725645	0.798517
AC12	F	0.454562	0.516113	0.64658	0.737937	0.877512	0.880253	0.88521	0.943982
AG15	F	0.530317	0.549433	0.586482	0.599996	0.652282	0.652848	0.684315	0.650774
AG16	F	0.433152	0.48778	0.54138	0.572265	0.617096	0.609693	0.652484	0.674993
AG27	F	0.540531	0.519743	0.579385	0.559289	0.621507	0.658985	0.720194	0.693101
AG28	F	0.467604	0.488421	0.516117	0.522228	0.516812	0.539028	0.576358	0.543913
AA01	M	0.458	0.580493	0.700494	0.756004	0.801293	0.741267	0.786085	0.810896
AA02	M	0.442071	0.63151	0.718623	0.743402	0.79018	0.765095	0.865603	0.768258
AA13	M	0.491431	0.531529	0.610687	0.710703	0.817166	0.876766	0.837748	0.909881
AA14	M	0.488931	0.564738	0.659643	0.691684	0.768588	0.7537	0.785106	0.857647
AC01	M	0.456	0.621584	0.604656	0.670403	0.677695	0.685223	0.729415	0.831122
AC02	M	0.440495	0.575322	0.595007	0.617415	0.668425	0.753335	0.710846	0.759964
AC05	M	0.485266	0.577823	0.644555	0.705075	0.754326	0.76979	0.799529	0.83597
AC06	M	0.625349	0.522785	0.642334	0.646306	0.795897	0.804739	0.764668	0.804204
AC09	M	0.483018	0.514503	0.602427	0.607082	0.640538	0.70197	0.687649	0.720019
AC10	M	0.516601	0.544929	0.672889	0.688807	0.756394	0.783573	0.839748	0.913413
AG13	M	0.555586	0.50921	0.530442	0.50138	0.560806	0.626404	0.6918	0.643468
AG14	M	0.50874	0.602448	0.579789	0.623554	0.70653	0.651982	0.745339	0.723374
AG17	M	0.449198	0.562621	0.613237	0.70262	0.668628	0.719147	0.737956	0.790971
AG18	M	0.494133	0.526532	0.616791	0.715116	0.761364	0.795745	0.822127	0.816025
