# Supplementary material for: Sex differences in discrimination behavior and orbitofrontal engagement during context-gated reward prediction
Source: eLife. 2024 Jul 24;12:RP93509. doi: 10.7554/eLife.93509 (PMC11268887; doi:10.7554/eLife.93509)
Supplement: Figure 2—figure supplement 1—source data 1. [file elife-93509-fig2-figsupp1-data1.xlsx]

## Sheet: Ctx-dep O1
RatID#	R. diestrus	R. estrus	R. metestrus	R. proestrus
AH09	0.79	0.75	0.82	0.64
AH10	0.73	0.79	0.79	0.82
AH11	0.8	0.79	0.94	0.95
AH12	0.79	0.92	0.9	0.71
AH21	0.67	0.66	0.71	0.68
AH22	0.77	0.85	0.84	0.82
AH23	0.94	0.93	0.93	0.88
AH24	0.88	0.86	0.88	0.91
