# Supplementary material for: Sex differences in discrimination behavior and orbitofrontal engagement during context-gated reward prediction
Source: eLife. 2024 Jul 24;12:RP93509. doi: 10.7554/eLife.93509 (PMC11268887; doi:10.7554/eLife.93509)
Supplement: Figure 2—source data 1. [file elife-93509-fig2-data1.xlsx]

## Sheet: Ctx-dep. O1
RatID#	Sex	LIGHT-pre	DARK-pre	LIGHT-X	DARK-X	LIGHT-Y	DARK-Y	Ratio	Discriminator	Session to Criterion
AB03	Female	0.62	3.52	12.33	6.36	21.7	36.89	0.64	YES	66
AB04	Female	0.37	0.29	11.25	6.68	16.23	16.69	0.55	NO	x
AB07	Female	4.76	6.65	74.77	15.59	21.59	79.43	0.81	YES	37
AB08	Female	7.73	7.59	72.33	24.15	23.29	88.93	0.77	YES	38
AB11	Female	3.44	7.16	70.12	61.24	35.86	59.22	0.57	NO	x
AB12	Female	2.6	4.48	30.87	44.51	23.79	32.6	0.48	NO	x
AB14	Female	4.96	8.35	86.7	60.77	40.26	83.94	0.63	NO	x
AB15	Female	5.69	1.22	82.37	20.29	9.18	48.95	0.82	YES	40
AB16	Female	0.98	2.08	37.37	10.59	5.46	25.62	0.8	YES	66
AE02	Female	12.18	17.07	89.29	62.85	83.49	90.81	0.55	NO	x
AE03	Female	1.32	1.59	6.53	4.14	4.38	0.13	0.44	NO	x
AE04	Female	9.76	7.85	2.06	5.72	15.44	10.43	0.37	NO	x
AE15	Female	3.02	5.02	75.83	60.91	35.31	83.6	0.62	NO	x
AE16	Female	7.93	9.04	65.07	53.07	54.94	72.06	0.56	NO	x
AG03	Female	0.97	0.12	76.67	36.76	33.17	97.47	0.71	YES	46
AG04	Female	2.91	2.81	51.15	50.48	36.92	36.87	0.5	NO	x
AG08	Female	0.63	1.93	13.14	0.64	6.85	50.31	0.89	YES	66
AG11	Female	7.6	4.65	66.05	35.56	31.8	61.64	0.65	NO	x
AG12	Female	5.27	5.18	80.63	41.69	30.98	63.48	0.66	YES	66
AH01	Female	9.04	10.17	62.89	31.95	37.71	86.43	0.68	YES	54
AH07	Female	7.48	12.27	85.52	37.28	25.22	92.01	0.74	YES	62
AH09	Female	5.42	8.75	67.7	18.68	33.27	64.4	0.72	YES	66
AH10	Female	18.63	16.6	85.86	80.82	79.6	79.58	0.51	NO	x
AH11	Female	0	0	13.26	1.18	2.58	11.02	0.87	YES	66
AH15	Female	17.1	10.9	56.46	51.09	59.69	71.63	0.53	NO	x
AH16	Female	22.71	16.89	81.88	69.82	62.44	75.73	0.54	NO	x
AH21	Female	13.09	11.64	82.48	55.24	26.46	79.29	0.66	NO	x
AH22	Female	9.46	6.97	78.07	26.93	23.68	79.32	0.75	YES	48
AH23	Female	0	1.23	44.63	7.21	3.73	65	0.91	YES	56
AH24	Female	0.96	1.35	77.64	17.65	28.73	76.73	0.77	YES	57
AB01	Male	3.64	6.35	68.93	8.58	13.9	93.87	0.88	YES	36
AB02	Male	6.73	5.38	89.4	7.87	15.45	52.4	0.86	YES	39
AB05	Male	3.07	4.62	55.16	18.08	8.01	47.02	0.8	YES	49
AB06	Male	12.51	6.36	66.93	20.55	8.68	74.07	0.83	YES	38
AB09	Male	2.05	2.7	39.23	9.45	20.05	35.3	0.72	YES	41
AB10	Male	2.48	4.78	33.43	15.2	9.3	35.7	0.74	YES	43
AB13	Male	1.66	3.24	64.47	5.44	4.93	40.02	0.91	YES	37
AE01	Male	3.73	3.18	43.17	12.96	15.8	70.37	0.8	YES	66
AE13	Male	4.6	3.67	94.47	52.95	68.25	98.78	0.61	NO	x
AE14	Male	2.58	3.51	40.98	18.25	11.38	45.45	0.74	YES	60
AG01	Male	5.55	5.03	57.72	16.39	19.02	75.92	0.79	YES	43
AG02	Male	7.5	3.51	69.09	8.58	9.84	78.8	0.89	YES	35
AG05	Male	5.49	6.89	68.96	15.6	12.17	50.2	0.81	YES	45
AG06	Male	6.13	5.5	60.39	19.17	2.86	20.95	0.79	YES	49
AG07	Male	2.69	1.93	58.22	17.7	5.27	58.57	0.84	YES	24
AG09	Male	3.2	0.91	64.03	7.81	2.13	21.97	0.9	YES	66
AG10	Male	7.67	8.94	58.65	20.12	25.86	51.07	0.7	YES	58
AG25	Male	3.59	3.1	47.6	18.29	12.13	77.46	0.8	YES	41
AG26	Male	4.78	6.24	67.18	22.58	21.02	85.32	0.78	YES	34
AH02	Male	12.17	10.54	65.58	38.07	71.65	81.47	0.57	NO	x
AH03	Male	3.57	3.63	51.5	27.46	42.53	31.7	0.54	NO	x
AH04	Male	3.41	5.21	35.75	19.4	39.99	37.63	0.55	NO	x
AH05	Male	15.47	6.63	60.36	24.88	28.96	86.94	0.74	YES	43
AH06	Male	4.86	3.83	47.42	10.46	11.62	54.01	0.82	YES	39
AH08	Male	5.08	7.67	53.84	8.22	13.7	74.23	0.86	YES	62
AH12	Male	0.85	0.84	50.52	9.34	7.13	39.24	0.84	YES	62
AH13	Male	12.68	10.61	75.03	24.64	19.13	62.16	0.76	YES	45
AH14	Male	11.66	5.55	67.91	54.23	20.73	55.61	0.62	NO	x
AH17	Male	6.6	3.55	77.32	25.84	20.25	43.01	0.72	YES	65
AH18	Male	12.81	11.16	82.73	58.78	39.09	64.26	0.6	NO	x
AH19	Male	11.63	6.82	81.09	17.62	16.15	75.5	0.83	YES	33
AH20	Male	8.35	3.84	79.17	40.87	13.26	60.49	0.72	NO	x

## Sheet: Simple
RatID#	Sex	LIGHT-pre	DARK-pre	LIGHT-X	DARK-X	LIGHT-Y	DARK-Y	Ratio	Discriminator	Session to Criterion																					RatID#	Sex
AA11	F	7.03	8.81	81.27	80.01	4.41	6.53	0.94	YES	3																					AA11	F
AA12	F	7.03	8.18	75.85	78.25	0.97	1.6	0.98	YES	5																					AA12	F
AA23	F	2.75	3.78	90.61	92.3	1.3	3.48	0.97	YES	2																					AA23	F
AA24	F	7.68	9.35	90.82	97.36	1.14	0	0.99	YES	3																					AA24	F
AE07	F	22.41	18.13	90.75	89.81	15.22	18.83	0.84	YES	3																					AE07	F
AE08	F	2.85	4.87	64.51	62.9	1.42	3.17	0.97	YES	1																					AE08	F
AE19	F	5.98	12.83	90.79	94.08	7.05	10.53	0.91	YES	2																					AE19	F
AE20	F	4.56	8.32	67.03	60.58	3.79	6.03	0.93	YES	2																					AE20	F
AG19	F	3.03	4.01	66.36	67.43	3.7	2.33	0.96	YES	3																					AG19	F
AG20	F	6.22	8.48	63.22	61.91	5.31	7.88	0.9	YES	5																					AG20	F
AG23	F	13	11.48	82.54	78.74	4.27	5.91	0.94	YES	5																					AG23	F
AG24	F	9.54	10.76	90.31	88.94	4.89	6.47	0.94	YES	2																					AG24	F
AA09	M	0.63	1.19	39.13	40.77	0.06	2.15	0.97	YES	2																					AA09	M
AA10	M	2.15	3.15	76.33	81.72	5.51	1	0.96	YES	2																					AA10	M
AA21	M	1.06	2	14.42	13.17	1.66	0.04	0.94	YES	1																					AA21	M
AA22	M	0.75	1.17	58.89	56.87	0	0.43	0.99	YES	2																					AA22	M
AE05	M	7.6	16.81	46.75	44.92	7.89	15.73	0.8	YES	3																					AE05	M
AE06	M	8.45	9.03	90.6	85.76	4.2	6.89	0.94	YES	5																					AE06	M
AE17	M	2.16	0.78	78.04	83.6	0.45	0.44	0.99	YES	1																					AE17	M
AE18	M	2	4.84	66.67	62.02	0.76	2.8	0.97	YES	2																					AE18	M
AG21	M	2.01	4.11	72.16	68.88	0.25	3.33	0.98	YES	2																					AG21	M
AG22	M	7.22	12.11	44.31	42.07	0.98	7.1	0.91	YES	2																					AG22	M
AG29	M	12.04	17.07	62.89	66.47	5.36	6.59	0.92	YES	4																					AG29	M
AG30	M	5.61	4.7	90.64	83.2	4.83	3.53	0.95	YES	3																					AG30	M
AI01	M	8.95	1.9	72.51	77.64	5.3	3.79	0.94	YES	3																					AI01	M
AI02	M	7.69	4.85	89.52	94.53	7.27	5.67	0.94	YES	4																					AI02	M
AI05	M	3.96	3.03	98.86	96.8	2.25	3.46	0.97	YES	1																					AI05	M
AI06	M	10.4	5.29	77.51	85.56	8.78	5.61	0.92	YES	2																					AI06	M
AI07	M	9.21	7.04	82.3	89.76	7.65	8.75	0.91	YES	3																					AI07	M
AI08	M	6.91	8.31	76.21	73.52	5.14	4.81	0.94	YES	3																					AI08	M
AI09	M	13.96	9.64	94.71	96.66	12.61	7.51	0.91	YES	4																					AI09	M
AI10	M	10.15	10.6	88.57	95.87	6.74	9.51	0.92	YES	2																					AI10	M
AI11	M	2.69	6	83.47	88.45	6.26	4.13	0.94	YES	3																					AI11	M
AI12	M	7.15	8.42	68.26	90.49	6.83	12.41	0.89	YES	3																					AI12	M

## Sheet: NoDiscr.
RatID#	Sex	LIGHT-pre	DARK-pre	LIGHT-X	DARK-X	LIGHT-Y	DARK-Y	Ratio	Discriminator	Session to Criterion
AA07	F	2.54267	4.26467	22.952	48.7023	58.7673	43.8293	0.46	NO	x
AA08	F	7.30575	8.522	49.314	38.1887	20.7423	37.0405	0.53	NO	x
AA19	F	5.915	2.31883	83.1343	69.509	47.0663	42.5083	0.52	NO	x
AA20	F	2.868	1.66783	61.2457	48.1553	39.7443	45.0942	0.61	NO	x
AE11	F	15.3403	13.2293	54.1983	56.916	54.0847	56.4253	0.48	NO	x
AE12	F	7.90667	10.251	33.718	30.6337	49.3527	49.8487	0.49	NO	x
AE23	F	9.20483	10.0067	22.6507	56.3197	57.844	45.403	0.48	NO	x
AE24	F	9.62383	9.53517	39.9167	43.3567	21.1913	27.1707	0.5	NO	x
AA05	M	12.5983	9.4375	35.8393	44.2403	78.3933	69.4083	0.46	NO	x
AA06	M	8.827	4.16325	90.366	79.2753	68.849	74.0927	0.53	NO	x
AA17	M	6.49867	5.16733	77.3713	69.7323	61.3307	70.0557	0.54	NO	x
AA18	M	3.39408	21.2051	49.7153	56.6607	22.111	51.7342	0.53	NO	x
AE09	M	4.43325	5.50883	24.1457	28.597	45.154	33.5977	0.53	NO	x
AE10	M	11.4046	15.1861	70.571	64.3733	67.5467	73.701	0.48	NO	x
AE21	M	0.340833	0.728083	5.22133	6.826	2.14433	5.05233	0.51	NO	x
AE22	M	0.56625	3.79983	31.3343	30.646	25.6063	25.8657	0.54	NO	x

## Sheet: Ctx-dep. O1-O2
RatID#	Sex	LIGHT-pre	DARK-pre	LIGHT-X	DARK-X	LIGHT-Y	DARK-Y	Ratio	Discriminator	Session to Criterion
AA03	F	3.55	4.13	50.91	4.1	17.93	71.79	0.85	YES	6
AA04	F	3.47	0.77	74.91	14.12	31.15	80.94	0.73	YES	21
AA15	F	6.27	0.69	89.82	18.75	3.73	17.26	0.83	YES	9
AA16	F	4.32	1.03	84.8	6.77	5.34	53.25	0.92	YES	12
AC03	F	7.08	6.81	61.84	20.2	40.54	95.22	0.69	YES	27
AC04	F	1.85	5.96	43.3	20.19	28.7	74.66	0.63	YES	25
AC07	F	9.24	7.89	92.21	13.88	6.21	97.66	0.86	YES	16
AC08	F	9.51	7.42	91.58	17.34	9.77	98.18	0.76	YES	9
AC11	F	11.19	4.36	94.08	30.69	33.54	91.98	0.8	YES	18
AC12	F	5.63	4.29	75.29	13.34	12.89	58.5	0.92	YES	13
AG15	F	4.64	8.3	73.94	28.32	38.14	87.77	0.62	YES	31
AG16	F	10.75	20.87	78.19	24.45	39.73	78.01	0.65	YES	38
AG27	F	6.84	13.22	66.63	20.08	21.14	93.02	0.71	YES	29
AG28	F	5.3	10.39	58.53	45.37	25.38	55.79	0.55	NO	x
AA01	M	2.72	7.89	74.55	16.68	18.81	83.75	0.82	YES	10
AA02	M	0.89	5.39	80.63	17.65	25.29	79.62	0.79	YES	10
AA13	M	3.65	6.22	77.58	10.52	9.54	95.25	0.9	YES	14
AA14	M	3.68	7.69	63.17	15.42	13.99	98.13	0.81	YES	15
AC01	M	4.2	7.55	92.44	14.58	23.08	95.03	0.8	YES	13
AC02	M	10.32	13.39	96.46	15.27	27.45	97.61	0.74	YES	19
AC05	M	5.88	8.65	93.97	15.4	12.12	97.98	0.82	YES	10
AC06	M	5.53	8.12	38.36	6.18	13.77	75.99	0.77	YES	10
AC09	M	7.3	3.61	87.33	13.99	9.82	84.94	0.69	YES	16
AC10	M	12.13	5.69	87.29	13.31	19.53	88.86	0.9	YES	7
AG13	M	4.87	10.69	56.78	12.26	25.17	99.27	0.64	YES	23
AG14	M	5.04	10.23	18.52	5.37	11.27	37.2	0.75	YES	28
AG17	M	2.38	5.28	69.92	24.43	29.19	89.98	0.81	YES	24
AG18	M	2.16	11.11	74.31	10.02	18.03	89.74	0.81	YES	13
