# Supplementary material for: Sex differences in discrimination behavior and orbitofrontal engagement during context-gated reward prediction
Source: eLife. 2024 Jul 24;12:RP93509. doi: 10.7554/eLife.93509 (PMC11268887; doi:10.7554/eLife.93509)
Supplement: Figure 3—source data 1. [file elife-93509-fig3-data1.xlsx]

## Sheet: Nonrewarded trials
		Time in Port (%)						Time in Port			Response Probability						Response Probability
		Previous rewards (detailed trial history)									Previous rewards (detailed trial history)
RatID#	Sex	-3	-2	-1	1	2		priorR	prior NR		-3	-2	-1	1	2		priorR	prior NR
AB03	Female	11.1423	18.712	15.1183	12.6767	15.4503		13.2749	13.7823		0.497817	0.684783	0.5	0.508475	0.515152		0.509934	0.537757
AB07	Female	12.8238	12.8259	11.9728	16.6208	11.8073		15.5826	12.598		0.759825	0.684783	0.747826	0.758333	0.666667		0.738562	0.740826
AB08	Female	23.4891	23.4546	21.3417	28.8008	30.4036		29.1465	22.9109		0.747664	0.761364	0.733945	0.752294	0.925926		0.786765	0.746959
AB15	Female	13.58	17.5285	14.6945	17.1158	14.7032		16.5964	14.7611		0.421875	0.506024	0.570093	0.635514	0.586207		0.625	0.481675
AB16	Female	8.31389	7.60047	7.80073	13.2639	12.0923		13.0117	8.01266		0.303665	0.364706	0.449541	0.53211	0.517241		0.528986	0.358442
AG03	Female	38.5077	37.0555	34.175	34.5161	31.9284		33.7858	36.9046		0.704762	0.686567	0.677083	0.696078	0.604938		0.670175	0.692668
AG08	Female	3.65147	3.96806	6.25116	2.10647	4.24526		2.687	4.56137		0.298507	0.169492	0.308511	0.168317	0.216216		0.181159	0.275261
AG12	Female	38.5513	35.482	47.6507	61.5375	57.2597		60.547	40.4661		0.636856	0.75	0.798995	0.878947	0.883333		0.88	0.705307
AH01	Female	9.98471	13.2227	10.6524	12.5847	12.6037		12.59	10.9178		0.348837	0.333333	0.4	0.430108	0.411765		0.425197	0.362319
AH07	Female	7.79816	8.68652	5.1	3.80017	6.73946		4.50636	7.25785		0.39819	0.375	0.25641	0.252174	0.27027		0.256579	0.35446
AH09	Female	17.275	12.1946	17.8636	21.5448	22.2627		21.7173	16.3664		0.585903	0.681319	0.690265	0.861111	0.806452		0.848921	0.633411
AH11	Female	4.42421	4.49152	4.80831	4.78188	12.9805		6.75169	4.54183		0.315556	0.380435	0.307692	0.321429	0.4		0.340136	0.327189
AH22	Female	16.1462	18.1499	14.5831	13.3248	11.6265		12.9592	16.146		0.542105	0.506024	0.577982	0.451327	0.483871		0.458333	0.544503
AH23	Female	7.94657	4.98696	9.69271	12.8332	20.2138		14.0033	7.83668		0.166667	0.166667	0.204724	0.21875	0.230769		0.220779	0.178147
AH24	Female	18.0242	21.9643	21.5922	20.0175	16.5438		19.4668	19.9465		0.433498	0.413793	0.458333	0.385827	0.461538		0.398693	0.436585
AB01	Male	12.3905	10.395	12.0781	24.8295	19.9158		23.7697	11.8902		0.451754	0.455556	0.455357	0.686275	0.666667		0.682171	0.453488
AB02	Male	30.113	31.5011	31.2219	34.944	24.4988		32.6911	30.6981		0.486957	0.511364	0.556522	0.609524	0.6		0.607407	0.510393
AB05	Male	13.7414	13.0007	13.1795	20.6398	20.2248		20.5503	13.4371		0.595556	0.666667	0.672414	0.727273	0.724138		0.726619	0.63109
AB06	Male	25.1545	24.7909	20.7051	27.2988	24.1758		26.6252	23.8954		0.694064	0.755814	0.645455	0.682243	0.666667		0.678832	0.693976
AB09	Male	15.1801	8.34891	11.982	18.1848	20.48		18.5487	12.7478		0.489796	0.431818	0.491525	0.741379	0.684211		0.733333	0.477612
AB10	Male	13.9928	15.6372	10.5286	11.8179	7.29355		10.8439	13.3783		0.59375	0.555556	0.54717	0.571429	0.741935		0.608392	0.572559
AB13	Male	4.36964	4.40988	5.58697	8.15292	7.17742		7.94292	4.72134		0.421053	0.447059	0.542056	0.552381	0.580645		0.558824	0.460733
AE01	Male	15.0954	18.4916	24.9905	33.4817	18.1079		29.7126	18.7561		0.372549	0.490385	0.52459	0.61165	0.514286		0.586957	0.444186
AE14	Male	17.4104	14.8398	14.6251	16.5515	16.9766		16.6586	15.9948		0.697802	0.597826	0.630631	0.59	0.709677		0.618321	0.654545
AG01	Male	19.1909	15.8557	26.7929	39.1054	19.8783		33.9553	20.8616		0.441558	0.455446	0.526667	0.657143	0.528302		0.621762	0.470954
AG02	Male	11.3084	9.9998	18.6445	23.1681	25.069		23.6706	13.3461		0.387665	0.408163	0.453333	0.559211	0.584906		0.565854	0.412632
AG05	Male	20.8702	15.6809	17.6652	28.2423	27.2757		27.9757	18.7863		0.480132	0.365672	0.536842	0.65445	0.68		0.661654	0.472843
AG06	Male	11.6291	8.77927	16.213	20.1389	21.9153		20.6206	12.4232		0.216667	0.218978	0.375661	0.447236	0.506494		0.463768	0.265176
AG07	Male	48.2681	57.2527	46.0262	55.9842	49.9639		54.6882	49.61		0.761905	0.75	0.708333	0.747253	0.821429		0.764706	0.745152
AG09	Male	9.85185	10.2684	9.76671	10.911	6.58456		9.81982	9.91343		0.400862	0.414141	0.360544	0.368098	0.272727		0.344037	0.391213
AG10	Male	25.558	23.2629	20.6858	24.7017	20.1698		23.5587	23.5744		0.479263	0.419355	0.442857	0.465409	0.472727		0.46729	0.455556
AG25	Male	35.419	49.5123	50.5316	57.3319	57.8745		57.546	44.8966		0.701031	0.842105	0.882883	0.917355	0.935897		0.924623	0.807547
AG26	Male	32.8584	49.254	38.1412	47.9447	44.7788		46.7528	38.5427		0.659574	0.810127	0.725926	0.861111	0.797468		0.838565	0.71831
AH05	Male	28.4016	23.8683	29.0453	26.6039	40.9341		30.0469	27.6228		0.655963	0.659341	0.632075	0.773585	0.941176		0.814286	0.650602
AH06	Male	7.09491	4.42457	5.55102	16.6465	9.78324		14.9975	6.11808		0.38565	0.377778	0.433628	0.730337	0.7		0.722689	0.396714
AH08	Male	7.49193	10.1841	12.7797	16.2526	17.2049		16.4814	9.48196		0.269058	0.351648	0.387387	0.447619	0.483871		0.455882	0.317647
AH12	Male	20.7578	18.61	20.907	31.7758	34.4915		32.2063	20.3411		0.477157	0.465909	0.446281	0.626016	0.695652		0.636986	0.465517
AH13	Male	26.1569	23.0565	25.2946	29.6993	20.57		28.252	25.2306		0.642857	0.681818	0.727273	0.884298	0.95		0.893617	0.676543
AH17	Male	8.8744	14.2133	11.5473	13.3677	9.55		12.7624	10.8276		0.318627	0.448276	0.401639	0.515385	0.695652		0.542484	0.37046
AH19	Male	10.7332	7.33587	7.65659	14.7762	10.1769		14.0471	9.07565		0.363184	0.321839	0.404762	0.666667	0.652174		0.664384	0.36715

## Sheet: Rewarded trials
		Time in Port (%)						Time in Port			Response Probability						Response Probability
		Previous rewards (detailed trial history)									Previous rewards (detailed trial history)
RatID#	Sex	-4	-3	-2	-1	1		priorR	prior NR		-4	-3	-2	-1	1		priorR	prior NR
AB03	Female	77.5184	82.5927	76.0617	81.6215	76.3187		76.3187	78.7516		0.985915	1	0.956522	1	0.97619		0.97619	0.985816
AB07	Female	81.323	83.999	76.1333	82.2976	81.7173		80.7159	80.6134		0.894737	1	0.913043	0.973684	0.969697		0.95	0.951389
AB08	Female	83.452	83.8055	66.6	83.3635	79.4443		79.4443	80.758		0.986111	1	0.913043	1	1		1	0.978873
AB15	Female	66.1509	66.0743	55.64	56.449	61.6189		61.6189	61.6661		0.953846	0.928571	0.956522	0.857143	0.875		0.875	0.923611
AB16	Female	72.233	49.5783	67.5566	71.2933	59.1415		61.56	66.0577		0.95	0.73913	0.885714	0.902439	1		1	0.877301
AG03	Female	78.831	84.8746	78.5919	84.2925	80.4319		80.7908	78.511		1	0.96	0.964912	0.970297	0.952381		0.959677	0.958188
AG08	Female	18.986	32.06	28.9161	27.6847	30.6474		32.3659	27.2957		0.7	1	0.83871	0.92	0.947368		0.896552	0.907143
AG12	Female	68.3419	69.1762	71.6281	73.2046	74.0296		74.044	71.9377		0.90625	0.904762	0.884615	0.883495	0.898305		0.9125	0.88255
AH01	Female	54.13	58.632	58.8363	57.6213	52.5067		55.5829	55.8022		1	1	1	1	0.971429		0.982456	0.976378
AH07	Female	49.323	43.061	50.3567	48.2048	47.3957		47.7323	47.7635		0.95	1	1	1	0.916667		0.930233	0.986928
AH09	Female	51.34	57.8048	53.33	53.76	58.1362		59.1018	53.7819		0.894737	0.904762	0.956522	1	0.970588		0.97561	0.946667
AH11	Female	31.324	41.8562	39.795	33.9962	34.6103		35.1409	37.0686		0.95	1	1	0.97619	1		1	0.973856
AH22	Female	86.194	80.1748	80.7371	91.6571	87.5889		88.8206	84.9243		0.95	0.9	0.935484	1	1		1	0.961783
AH23	Female	49.48	50.7	54.3594	54.6738	53.2119		54.3081	52.7729		0.95	0.869565	1	1	0.961538		0.967742	0.962733
AH24	Female	86.529	73.1017	83.844	86.1838	73.8467		73.8512	82.9963		1	0.85	0.939394	0.921053	0.833333		0.827586	0.929487
AB01	Male	84.3675	86.3291	78.3592	85.7505	82.1847		82.1847	83.9188		0.972973	0.909091	0.956522	0.972973	0.928571		0.928571	0.965517
AB02	Male	63.3197	53.8818	67.3375	68.826	67.894		67.894	64.7388		0.853333	0.545455	0.958333	0.794872	0.857143		0.857143	0.832215
AB05	Male	50.2344	33.4982	52.8892	44.4945	49.1821		49.1821	47.9012		0.972603	1	1	0.973684	0.977778		0.977778	0.979452
AB06	Male	71.9163	71.6709	71.1275	72.2045	72.554		72.554	71.8489		0.985294	1	1	1	1		1	0.992701
AB09	Male	33.5458	36.4343	32.2574	37.7562	38.9223		38.9223	34.8399		0.875	0.928571	0.954545	1	0.971429		0.971429	0.929577
AB10	Male	34.9164	34.8971	42.0904	38.99	33.1411		33.1411	37.2324		0.893939	1	0.956522	0.95122	0.882353		0.882353	0.93007
AB13	Male	45.7218	34.9586	45.4052	42.7186	48.3423		48.3423	43.7625		1	1	1	1	0.941176		0.941176	1
AE01	Male	56.9956	46.2221	56.1274	62.2411	59.9079		59.9079	56.7514		0.876543	0.789474	0.684211	0.848485	0.925		0.925	0.835526
AE14	Male	48.8319	46.3733	45.1389	41.6533	41.6975		41.6975	46.5055		1	0.933333	0.944444	0.966667	1		1	0.977941
AG01	Male	74.5896	56.708	56.3719	62.097	54.8857		54.8479	62.1665		1	0.894737	0.847826	0.894737	0.824561		0.831325	0.890411
AG02	Male	64.8829	48.7344	79.852	74.424	70.4568		65.6421	68.5198		0.809524	0.722222	0.959184	0.833333	0.8		0.8	0.825328
AG05	Male	46.9187	45.2571	51.2981	54.4575	61.7908		63.9511	51.9094		0.806452	0.642857	0.754717	0.823529	0.878378		0.909091	0.797203
AG06	Male	35.6065	42.8929	40.9671	51.0907	43.498		45.7208	43.6681		0.741935	0.75	0.75	0.831776	0.657895		0.6875	0.77027
AG07	Male	81.4218	92.0486	80.2817	90.3343	84.1057		84.1057	84.8486		0.969231	1	0.954545	1	0.884615		0.884615	0.978571
AG09	Male	39.633	49.39	43.736	40.6918	44.4888		43.622	43.0848		0.95	1	0.931818	0.964706	0.947368		0.883721	0.964444
AG10	Male	43.357	54.961	54.9031	59.6094	54.8437		55.0611	54.8555		0.789474	1	0.902439	0.961039	0.913793		0.908046	0.913043
AG25	Male	61.9971	68.7074	74.1981	73.1532	78.7523		77.5408	71.6964		0.785714	0.894737	0.938776	0.944954	0.986301		0.992537	0.920561
AG26	Male	62.9109	72.6238	57.4011	67.9344	79.5983		77.9694	64.4044		0.818182	1	0.740741	0.864407	0.954545		0.944828	0.850806
AH05	Male	69.634	77.2438	71.3292	68.7843	78.5119		76.2441	71.4839		0.95	0.952381	0.956522	0.926829	1		0.974359	0.946309
AH06	Male	25.548	22.339	35.36	29.2338	31.5227		31.7055	28.3749		1	0.952381	1	1	1		1	0.979452
AH08	Male	78.409	77.9648	71.3383	69.8781	70.2654		70.5318	72.9119		1	1	0.916667	0.95	0.964286		0.971429	0.958621
AH12	Male	74.001	60.6287	67.9389	72.0986	82.3993		83.2894	68.5112		0.944444	0.714286	0.941176	0.923077	0.954545		0.962963	0.89172
AH13	Male	66.531	66.5878	66.3994	67.7281	73.5		72.9619	65.5784		0.95	0.95	0.969697	1	1		1	0.974684
AH17	Male	44.122	49.8174	50.0211	50.979	49.0356		50.4269	49.3299		0.8	0.956522	0.914286	0.9	0.962963		0.96875	0.896341
AH19	Male	77.145	66.7574	73.4211	80.5943	79.5111		78.9262	74.1414		1	0.913043	1	0.974359	1		1	0.968354

## Sheet: Sheet1
AB01	Male	3.64	6.35	68.93	8.58	13.9	93.87	0.88	YES	36
AB02	Male	6.73	5.38	89.4	7.87	15.45	52.4	0.86	YES	39
AB05	Male	3.07	4.62	55.16	18.08	8.01	47.02	0.8	YES	49
AB06	Male	12.51	6.36	66.93	20.55	8.68	74.07	0.83	YES	38
AB09	Male	2.05	2.7	39.23	9.45	20.05	35.3	0.72	YES	41
AB10	Male	2.48	4.78	33.43	15.2	9.3	35.7	0.74	YES	43
AB13	Male	1.66	3.24	64.47	5.44	4.93	40.02	0.91	YES	37
AE01	Male	3.73	3.18	43.17	12.96	15.8	70.37	0.8	YES	66
AE14	Male	2.58	3.51	40.98	18.25	11.38	45.45	0.74	YES	60
AG01	Male	5.55	5.03	57.72	16.39	19.02	75.92	0.79	YES	43
AG02	Male	7.5	3.51	69.09	8.58	9.84	78.8	0.89	YES	35
AG05	Male	5.49	6.89	68.96	15.6	12.17	50.2	0.81	YES	45
AG06	Male	6.13	5.5	60.39	19.17	2.86	20.95	0.79	YES	49
AG07	Male	2.69	1.93	58.22	17.7	5.27	58.57	0.84	YES	24
AG09	Male	3.2	0.91	64.03	7.81	2.13	21.97	0.9	YES	66
AG10	Male	7.67	8.94	58.65	20.12	25.86	51.07	0.7	YES	58
AG25	Male	3.59	3.1	47.6	18.29	12.13	77.46	0.8	YES	41
AG26	Male	4.78	6.24	67.18	22.58	21.02	85.32	0.78	YES	34
AH05	Male	15.47	6.63	60.36	24.88	28.96	86.94	0.74	YES	43
AH06	Male	4.86	3.83	47.42	10.46	11.62	54.01	0.82	YES	39
AH08	Male	5.08	7.67	53.84	8.22	13.7	74.23	0.86	YES	62
AH12	Male	0.85	0.84	50.52	9.34	7.13	39.24	0.84	YES	62
AH13	Male	12.68	10.61	75.03	24.64	19.13	62.16	0.76	YES	45
AH17	Male	6.6	3.55	77.32	25.84	20.25	43.01	0.72	YES	65
AH19	Male	11.63	6.82	81.09	17.62	16.15	75.5	0.83	YES	33
