# Supplementary material for: Sex differences in discrimination behavior and orbitofrontal engagement during context-gated reward prediction
Source: eLife. 2024 Jul 24;12:RP93509. doi: 10.7554/eLife.93509 (PMC11268887; doi:10.7554/eLife.93509)
Supplement: Figure 4—source data 1. [file elife-93509-fig4-data1.xlsx]

## Sheet: Ctx-dep O1
		BASELINE - NOSTRESS								STRESS
Rat(D#	Sex	ApreCS	preCS	AX	X	AY	Y	ratio		ApreCS	preCS	AX	X	AY	Y	ratio
AB07	Female	9.13	6.64	76.16	19.3	26.97	82.11	0.77		9.88	8.96	61.34	9.24	26.6	67.38	0.79
AB08	Female	14.81	7.07	73.85	30.62	25.03	81.85	0.74		0.98	7.6	48.02	15.57	17.43	50.3	0.75
AB15	Female	5.79	1.85	74.41	21.51	13.67	50.48	0.78		4.42	3.63	71.48	27.79	27.29	58.31	0.7
AB16	Female	1.97	2.27	35.83	15.9	6.63	25.54	0.73		7.12	5.83	34.92	22.31	15.16	26.83	0.62
AG03	Female	11.99	11.79	89.52	25	22.88	95.14	0.79		7.69	8.61	99.07	20.48	21.54	86.95	0.82
AG08	Female	1.6	1.45	51.09	4.91	5.06	44.42	0.91		0	0.66	56.5	13.29	8.43	61.94	0.85
AG12	Female	13.14	14.92	79.65	42.19	30.86	71.9	0.67		12.95	22.79	67.88	35.2	31.08	67.04	0.67
AH09	Female	8.02	8.46	70.61	14.09	18.95	72.38	0.81		20.89	12.04	70.09	43.67	41.36	69.93	0.62
AH22	Female	11.97	10.99	85.76	23.72	19.76	77.92	0.79		10.98	27.82	89.14	41.35	19.02	88.12	0.75
AH23	Female	0.76	1.47	62.53	1.59	4.35	71.08	0.96		0.76	0.4	57.33	2.54	6.44	53.27	0.92
AH24	Female	2.99	1.59	83.16	10.86	16	77.62	0.86		3.38	0.74	77.27	8.92	10.86	86.66	0.89
AB01	Male	11.53	8.79	73.64	13.08	23.93	95.99	0.82		9.38	5.03	69.81	33.98	34.25	64.54	0.66
AB02	Male	12.42	7.51	54.55	18.31	23.27	80.2	0.76		11.78	10.57	49.47	17.86	19.89	69.68	0.76
AB05	Male	11.56	10.59	75.93	27.78	23.22	82	0.76		11.36	11	71.09	25.49	21.93	53.49	0.72
AB06	Male	17.03	4.91	70.96	25.49	29.23	78.72	0.73		13.42	10.18	68.3	34.58	23.84	46.69	0.66
AE01	Male	4.8	4.01	37.73	8.74	34.03	77.85	0.73		8.99	14.54	39.66	15.42	50.38	84.87	0.65
AE14	Male	2.22	2.8	43.83	13.94	13.99	42.65	0.76		9.23	13.53	22.33	29.28	24.34	21.61	0.45
AG01	Male	18.71	15.51	86.58	21.5	24.24	92.85	0.8		4.03	1.48	54.93	24.64	17.68	35.99	0.68
AG02	Male	7.22	10.28	84.71	23.53	19.32	59.88	0.77		6.62	9.12	0	15.7	9.88	29.14	0.53
AG05	Male	6.44	5.97	60.25	9.25	9.48	52.62	0.86		2.5	9.85	2.57	11.55	31.18	28.97	0.42
AH05	Male	10.07	8.56	56.64	15.71	16.58	76.44	0.8		2.33	6.08	21.01	16.34	5.88	46.34	0.75
AH06	Male	6.39	6.72	32.14	7.64	13.62	52.14	0.8		2.11	1.61	35.31	8.83	21.06	19.87	0.65
AH08	Male	7.67	7.04	51.87	4.1	8.14	74.04	0.91		10.09	7.73	43.42	12.01	15.29	53.3	0.78
AH13	Male	6.08	8.71	69.91	23.47	19.02	59.94	0.75		3.73	8.26	28.06	13.2	15.34	51.8	0.74
AH17	Male	6.63	11.36	59.46	19.16	16.71	38.86	0.73		13.92	9.26	22.14	14.86	18.42	20.73	0.56
AH19	Male	8.45	8.87	74.66	13.99	11.94	60.9	0.84		7.45	5.23	28.56	9.13	14.53	60.03	0.79

## Sheet: Simple
		BASELINE - NOSTRESS								STRESS
Rat(D#	Sex	ApreCS	preCS	AX	X	AY	Y	ratio		ApreCS	preCS	AX	X	AY	Y	ratio
AE07	Female	24.48	21.63	62.72	80.62	12.27	17.31	0.83		35.18	23.04	90.73	88.48	19.02	16.58	0.83
AE08	Female	2.59	6.49	69.35	70.33	8.11	6.24	0.91		1.72	2.94	49.76	61.12	2.88	0.9	0.97
AE19	Female	12.64	17.33	93.48	95.66	7.99	14.83	0.89		9.03	7.75	88.34	88.33	5.32	4.79	0.95
AE20	Female	8.16	8.14	72.95	70.62	6.47	7.68	0.91		5.88	6.14	61.74	61.01	2.74	5.17	0.94
AG19	Female	10.73	8.62	64.33	66.33	7.79	7.75	0.89		8.82	8.43	67.83	66.17	5.82	6.45	0.92
AG20	Female	13.25	9.71	71.48	71.35	8.55	9.21	0.89		8.9	8.69	71.61	68.36	6	6.44	0.92
AE05	Male	12	8.81	39.1	37.2	10.7	5.86	0.82		8.27	14.14	45.3	44.5	8.8	9	0.83
AE06	Male	19.51	8.93	90.85	98.52	9	4.93	0.93		8.11	12.46	92.7	96.1	9.4	11.1	0.9
AE17	Male	1.9	2.26	72.78	66.39	3.53	1.28	0.97		0.33	0.47	77.4	68.6	0.6	0.7	0.99
AE18	Male	5.35	2.74	60.85	65.8	5.29	10.01	0.89		3.76	6.58	67.8	60.2	4.1	3.8	0.94
AG29	Male	11.74	10.19	72.06	73.47	8.65	9.13	0.89		11.14	9.99	76.5	77.9	7.2	6.8	0.92
AG30	Male	9.04	9.09	64.67	66.76	7.84	8.3	0.89		7.48	8.37	69.5	64.6	6.4	6	0.92

## Sheet: NoDiscr.
		BASELINE - NOSTRESS								STRESS
Rat(D#	Sex	ApreCS	preCS	AX	X	AY	Y	ratio		ApreCS	preCS	AX	X	AY	Y	ratio
AA07	Female	2.54	4.26	22.95	19.91	58.77	44.78	0.46		2.85	4.15	24.15	22.84	70.61	53.14	0.53
AA08	Female	7.31	8.52	49.31	38.19	24.46	19.17	0.53		6.85	6.79	39.61	36.54	29.54	23.45	0.55
AA19	Female	5.92	2.32	83.13	69.51	47.07	43.54	0.52		6.71	2.56	84.66	53.84	41.83	43.95	0.52
AA20	Female	2.87	1.67	61.25	27.74	39.74	45.09	0.61		2.61	1.43	56.43	45.35	34.56	42.23	0.57
AE11	Female	13.99	15.13	54.2	56.92	57.3	54.51	0.48		15.41	18.55	53.27	52.47	58.6	66.1	0.49
AE12	Female	7.91	10.25	37.64	34.85	51.94	58.17	0.49		16.31	15.56	41.1	33.38	69.84	62.59	0.46
AE23	Female	9.2	10.01	40.29	39.65	57.84	52.77	0.48		11.24	31.53	31.59	47.29	56.95	67.27	0.44
AE24	Female	12.57	14.62	94.08	89.91	75.01	88.91	0.5		13.12	11.33	97.95	82.21	83.9	96.36	0.55
AA05	Male	12.6	9.44	35.84	44.24	78.39	69.41	0.46		12.41	10.97	36.91	39.9	79.68	70.78	0.49
AA06	Male	8.83	4.16	90.37	79.28	68.85	74.09	0.53		11	4.65	72.01	95.12	62.07	73.83	0.51
AA17	Male	6.5	5.17	77.37	69.73	61.33	75.97	0.54		5.25	5.88	94.35	53.92	48.34	86.32	0.52
AA18	Male	9.62	9.54	31.74	31.72	25.61	26.13	0.53		18.09	28.19	50.65	50.45	52.36	38.96	0.53
AE09	Male	4.43	5.51	31.69	29.04	42.99	50.62	0.53		6.48	6.12	20.21	23.95	35.44	42.96	0.52
AE10	Male	11.4	15.19	70.57	64.37	90.56	85.16	0.48		26.91	51.04	87.9	97.61	89.16	86.06	0.52
AE21	Male	0.54	0.94	3.87	6.83	1.6	1.79	0.51		1.43	3.4	18.3	19.21	10.13	11.15	0.57
AE22	Male	3.97	4.99	31.33	30.65	29.17	30.1	0.54		3.46	5.35	52.8	60.73	46.8	51.88	0.51

## Sheet: Ctx-dep. O1-O2
		BASELINE - NOSTRESS								STRESS
Rat(D#	Sex	ApreCS	preCS	AX	X	AY	Y	ratio		ApreCS	preCS	AX	X	AY	Y	ratio
AC03	Female	6.45	6.91	58.28	19.4	30	92.84	0.75		5.07	18.42	28.23	21.82	27.53	89.93	0.71
AC04	Female	1.53	5.73	53.52	27.97	25.02	76.93	0.68		4.54	18.84	34.12	19.54	46.26	85.13	0.64
AC07	Female	9.24	7.89	92.21	13.88	6.21	97.66	0.9		17.9	18.66	84.43	27.54	19.99	74.27	0.77
AC08	Female	9.51	7.42	91.58	17.34	9.77	98.18	0.88		10.87	5.22	72.01	52.43	9.54	99.96	0.74
AC11	Female	11.19	4.36	94.08	30.69	33.54	91.98	0.74		24.4	16	99.62	38.59	61.05	93.16	0.66
AC12	Female	5.63	4.29	75.29	13.34	12.89	68.5	0.84		4.53	3.78	63.27	11.5	19.77	58.89	0.8
AG15	Female	7.26	6.1	84.16	10.44	19.57	86.01	0.8		11.22	13.49	63.62	28.57	30.69	83.56	0.71
AC01	Male	4.2	7.55	92.44	14.58	23.08	95.03	0.83		5.03	19.75	56.16	21.59	24.87	96.83	0.77
AC02	Male	10.32	13.39	96.46	15.27	27.45	97.61	0.82		14.65	24.73	72.99	38.81	47.76	79.79	0.64
AC05	Male	5.88	8.65	93.97	15.4	12.12	97.98	0.87		4.78	6.73	95.38	22.83	14.07	97.58	0.84
AC06	Male	5.53	8.12	38.36	6.18	13.77	75.99	0.85		7.78	24.55	23.76	6.59	32.63	72.66	0.71
AC09	Male	7.3	3.61	87.33	13.99	9.82	84.94	0.88		8.22	1.9	56.01	11.8	19.7	52.92	0.78
AC10	Male	12.13	5.69	87.29	13.31	19.53	88.86	0.84		9.9	9.03	56.93	28.81	48.57	74.62	0.63
AG14	Male	7.56	7.84	82.64	13.12	17.63	90.07	0.85		8.39	14.45	60.21	21.74	31.27	79.07	0.72
