# Supplementary material for: Sex differences in discrimination behavior and orbitofrontal engagement during context-gated reward prediction
Source: eLife. 2024 Jul 24;12:RP93509. doi: 10.7554/eLife.93509 (PMC11268887; doi:10.7554/eLife.93509)
Supplement: Figure 5—source data 1. [file elife-93509-fig5-data1.xlsx]

## Sheet: Homecage
RatID#	Sex	OFC-M	OFC-V	OFC-L	M1	S1J
AA24	Female	3.04184	4.09583	3.25898	3.04931	6.10061
AA07	Female	13.8985	14.9942	5.37963	3.70793	6.5377
AA29	Male	5.59719	5.22329	3.50714	3.60065	2.97766
AA30	Male	37.189	30.3918	26.906	6.69622	6.37578
		7.51252	8.10446	4.04858	3.45263	5.20533

## Sheet: Ctx.dep O1
RatID#	Sex	d. ratio	OFC-M	OFC-V	OFC-L	M1	S1J
AG03	Female	0.7	131.7	182.99	138.44	46.42	22.52
AG08	Female	0.79	40.85	58.31	46.09	52.57	6.85
AG12	Female	0.73	73.2	64.59	77.24	7.64	7.77
AH09	Female	0.73	125.54	232.63	298.67	35.83	18.59
AH22	Female	0.93	120.06	283.83	327.17	15	8.76
AH23	Female	0.73	184.81	170.2	91.66	33.51	17.18
AH24	Female	0.79	200.24	278.93	310.48	48.88	57.02
AG01	Male	0.77	30.54	37.29	51.97	19.53	21.39
AG02	Male	0.86	35.04	33.58	32.74	11.12	6.28
AG05	Male	0.79	61.07	120.84	111.16	51.88	35.04
AH05	Male	0.74	30.36	38.66	39.08	15.81	12.61
AH06	Male	0.87	98.32	125.11	50.97	20.42	17.69
AH08	Male	0.87	168.58	242.28	162.78	22.78	22.03
AH13	Male	0.94	16.21	16.58	20.37	28.33	1.55
AH17	Male	0.78	80.6	53.52	48.87	10.22	6.16
AH19	Male	0.67	49.11	73.94	49.18	11.7	10.19

## Sheet: Simple
RatID#	Sex	d. ratio	OFC-M	OFC-V	OFC-L	M1	S1J
AA12	Female	0.98	133.18	194.56	190.97	34.34	15.74
AE07	Female	0.86	61.11	118.09	103.81	31.17	20.19
AE08	Female	0.97	168.17	223.5	294.14	81.61	77.57
AE19	Female	0.95	47.52	18.36	12.01	3.26	1.45
AG20	Female	0.98	102.08	260.93	285.29	36	17
AG23	Female	0.88	54.53	23.44	6.17	10.3	1.96
AG24	Female	0.92	32.55	27.33	21.97	27.05	15.99
AA21	Male	0.92	88.01	192	201.59	39.03	5.38
AA22	Male	1	50.29	108.54	149.66	32.76	24.09
AE05	Male	0.87	38.35	81.11	70.75	24.69	8.88
AE06	Male	0.9	102.08	139.06	188.92	43.81	11.62
AE17	Male	0.91	33.57	78.93	84.53	37.2	3.3
AE18	Male	0.93	73.57	21.82	29.44	6.97	5.07
AG22	Male	0.98	92.16	123.68	110.91	52.03	17.86
AG29	Male	0.88	95.67	187.14	193.72	58.98	24.2
AG30	Male	0.94	56.42	144.05	182.43	27.93	39.2

## Sheet: NoDiscr.
RatID#	Sex	d. ratio	OFC-M	OFC-V	OFC-L	M1	S1J
AA08	Female	0.448898	29.9951	55.3	26.797	8.67322	7.16601
AA19	Female	0.505194	65.4628	174.717	233.733	47.9941	13.4004
AA20	Female	0.59646	49.4809	38.2043	56.7527	26.5438	15.742
AE11	Female	0.505447	34.4915	74.7966	91.1022	34.2958	11.5059
AE12	Female	0.485796	68.5968	79.4948	76.998	15.7498	9.41828
AE23	Female	0.463488	43.8009	151.137	266.667	81.5462	27.5897
AE24	Female	0.545025	95.8405	90.9045	236.924	57.4815	14.2206
AA06	Male	0.521614	55.3812	94.9363	141.282	38.8978	14.149
AA17	Male	0.496397	114.631	234.932	372.06	57.0983	26.9198
AA18	Male	0.514055	171.317	229.984	338.456	135.482	39.646
AE09	Male	0.527149	29.6294	109.807	82.1775	29.412	6.90312
AE10	Male	0.504592	48.5804	59.5982	96.0636	23.8096	23.1199
AE21	Male	0.467837	35.7143	116.23	127.828	11.896	10.5513
AE22	Male	0.53404	67.0122	90.5656	67.2325	18.2037	10.7142

## Sheet: Ctx.dep O1-O2
RatID#	Sex	d. ratio	OFC-M	OFC-V	OFC-L	M1	S1J
AC03	Female	0.78	51.68	163.04	191.84	82.29	43
AC07	Female	0.68	84.39	187.79	209.88	55.85	24.39
AC08	Female	0.82	35.71	116.23	127.83	11.9	10.55
AG15	Female	0.91	165.78	284.1	309.97	73.35	19.63
AG27	Female	0.77	51.74	43.38	58.65	20.41	13.16
AC01	Male	0.83	47.21	64.18	35.12	7.73	14.35
AC02	Male	0.73	64.71	123.49	155.22	44.15	16.2
AC05	Male	0.89	74.64	101.22	96.79	27.93	9.62
AG14	Male	0.76	147.07	322.03	317.41	125.96	46.59
AG18	Male	0.9	78.78	90.76	63.22	10.46	9.08
